# Supplementary material for: The realities of partnership in person-centred care: a qualitative interview study with patients and professionals
Source: PubMed Central journal article supplement — BMJ Open. 2017 Jul 17;7(7):e016491. doi: 10.1136/bmjopen-2017-016491 (PMC5726073; doi:10.1136/bmjopen-2017-016491), 2017-07-17
Supplement: bmjopen-2017-016491.draft_revisions.pdf [file bmjopen-2017-016491.draft_revisions.pdf]

# BMJ Open

## The realities of partnership in person-centred care: a qualitative interview study with patients and professionals

|                                 |                                                                                                                                                                                                                                                                                                                                                                                                                                                                                                                                                                                                                                                                                                                                                                                                           |
|---------------------------------|-----------------------------------------------------------------------------------------------------------------------------------------------------------------------------------------------------------------------------------------------------------------------------------------------------------------------------------------------------------------------------------------------------------------------------------------------------------------------------------------------------------------------------------------------------------------------------------------------------------------------------------------------------------------------------------------------------------------------------------------------------------------------------------------------------------|
| Journal:                        | <i>BMJ Open</i>                                                                                                                                                                                                                                                                                                                                                                                                                                                                                                                                                                                                                                                                                                                                                                                           |
| Manuscript ID                   | bmjopen-2017-016491                                                                                                                                                                                                                                                                                                                                                                                                                                                                                                                                                                                                                                                                                                                                                                                       |
| Article Type:                   | Research                                                                                                                                                                                                                                                                                                                                                                                                                                                                                                                                                                                                                                                                                                                                                                                                  |
| Date Submitted by the Author:   | 17-Feb-2017                                                                                                                                                                                                                                                                                                                                                                                                                                                                                                                                                                                                                                                                                                                                                                                               |
| Complete List of Authors:       | <p>Wolf, Axel; Health and Care Sciences, Sahlgrenska academy, University of Gothenburg; Centre for Person-Centred Care (GPCC), University of Gothenburg</p> <p>Moore, Lucy; University of Exeter Medical School</p> <p>Lydahl, Doris; Department of Sociology and Work Science, University of Gothenburg</p> <p>Naldemirci, Öncel; Department of Sociology and Work Sciences, University of Gothenburg</p> <p>Elam, Mark; Department of Sociology and Work Science, University of Gothenburg,</p> <p>Britten, Nicky; University of Exeter Medical School, PenCLAHRC: National Institute for Health Research (NIHR) Collaboration for Leadership in Applied Health Research and Care (CLAHRC) for the South West Peninsula; University of Exeter Medical School, Institute for Health Service Research</p> |
| <b>Primary Subject Heading</b>: | Health services research                                                                                                                                                                                                                                                                                                                                                                                                                                                                                                                                                                                                                                                                                                                                                                                  |
| Secondary Subject Heading:      | Qualitative research, Nursing, Medical management, Evidence based practice                                                                                                                                                                                                                                                                                                                                                                                                                                                                                                                                                                                                                                                                                                                                |
| Keywords:                       | person-centred care, patient participation, partnership, patient-centered care                                                                                                                                                                                                                                                                                                                                                                                                                                                                                                                                                                                                                                                                                                                            |
|                                 |                                                                                                                                                                                                                                                                                                                                                                                                                                                                                                                                                                                                                                                                                                                                                                                                           |

SCHOLARONE™  
Manuscripts

# The realities of partnership in person-centred care: a qualitative interview study with patients and professionals

Axel Wolf<sup>1,2\*</sup>, Lucy Moore<sup>3</sup>, Doris Lydahl<sup>4</sup>, Öncel Naldemirci<sup>4</sup>, Mark Elam<sup>4</sup>, Nicky Britten<sup>5,6</sup>

1 Institute of Health Care Sciences, Sahlgrenska Academy, University of Gothenburg, Gothenburg, Sweden

2 Gothenburg Centre for Person Centred Care (GPCC), University of Gothenburg, Gothenburg, Sweden

3 University of Exeter Medical School, Institute of Biomedical and Clinical Science, Exeter, UK

4 Department of Sociology and Work Sciences, University of Gothenburg, Gothenburg, Sweden

5 University of Exeter Medical School, Institute for Health Service Research, Exeter, UK

6 University of Exeter Medical School, PenCLAHRC: National Institute for Health Research (NIHR) Collaboration for Leadership in Applied Health Research and Care (CLAHRC) for the South West Peninsula, UK

Corresponding author:

Axel Wolf, Institute of Health Care Sciences, Sahlgrenska Academy, University of Gothenburg, Gothenburg, Sweden.

E-mail: axel.wolf@gu.se

Phone: +46 (0)31-7866034

Fax: +46 (0) 31-7866050

1  
2  
3 •  
4  
5  
6  
7

## 8 ABSTRACT

9  
10  
11 **Objective:** Although conceptual definitions of person-centred care (PCC) vary,  
12 most models value the active involvement of patients through patient-  
13 professional partnerships. However, while this may increase patients' sense of  
14 responsibility and control, relational, contextual and affective aspects of  
15 partnership are increasingly emphasised. The aim of this study is to explore the  
16 realities of partnership and participation as perceived by patients and health  
17 professionals in everyday PCC practice.  
18  
19

20  
21  
22 **Design:** Qualitative study employing an interpretive approach using semi-  
23 structured interviews with professionals and patients.  
24  
25

26  
27  
28 **Setting:** Four internal medicine wards and 2 primary care centres in western  
29 Sweden.  
30

31  
32 **Participants:** 20 patients admitted to hospital wards delivering person-centred  
33 care and 16 health professionals based on these wards and primary care centres.  
34  
35

36  
37 **Results:** Our findings identified both informal and formal aspects of partnership  
38 in the delivery of person-centred care. Informal aspects incorporated proximity  
39 and receptiveness of professionals, and building a close connection and  
40 confidence. This epitomised a caring, respectful relationship congruent across  
41 accounts. Formal aspects and descriptions of partnership were more  
42 dichotomous. Professionals described collaborating with patients to encourage  
43 participation, capture personal goals, plan and document care. However,  
44 although patients felt listened to and informed, they were content to ask  
45 questions and felt less involved in care planning, documentation or exploring  
46 lifeworld goals. They commonly perceived participation as informed discussion  
47 and agreement, deferring to professional knowledge and expertise in the  
48 presence of an empathetic and trusting relationship.  
49  
50  
51  
52  
53  
54  
55

56  
57 **Conclusions:**  
58  
59  
60

1  
2  
3 In our study patients appear to value a process of human connectedness above  
4 and beyond formalised aspects of documenting agreed goals and care planning.  
5 The PCC pathway or mechanism increases patients' confidence in professionals  
6 who are competent and able to make them feel safe and secure. Informal  
7 elements of partnership provide the conditions for communication and mutual  
8 co-operation upon which formal relations of partnership can be constructed.  
9

10  
11  
12  
13  
14 Keywords:

15  
16 Person-Centred Care, Patient-Centred Care, Patient Participation, Healthcare  
17 service  
18

19  
20  
21 **Strengths and limitations of this study:**

- 22 • This study reports the experiences of both patients and professionals in  
23 hospital settings which have implemented an evidence based model of  
24 person centred care .  
25  
26
- 27 • The study population consisted of professionals with a broad range of  
28 clinical experience and patients with diverse medical signs and  
29 symptoms.  
30  
31
- 32 • Our sample was not designed to be statistically representative, nor can we  
33 claim to have reached data saturation.  
34  
35  
36  
37  
38  
39  
40  
41  
42  
43

44 **INTRODUCTION**

45  
46 Increasingly clinicians are encouraged to engage, inform and involve patients <sup>12</sup>  
47 and support health policies that promote patient led care through 'activated'  
48 patients trained in self-management skills <sup>3 4</sup>. Health professionals and policy  
49 makers aspire towards person centred care (PCC) <sup>5-7</sup> and recent models of PCC  
50 prioritise a whole systems approach that places patients at the centre <sup>8-10</sup>. It is  
51 clear that with professional support, patients can become active partners in their  
52 care <sup>11-15</sup> and can benefit from opportunities to take part <sup>16 17 18</sup>. However,  
53 despite the development of PCC and the push towards patient professional  
54  
55  
56  
57  
58  
59  
60

1  
2  
3 partnerships <sup>8</sup>, there is much talk and little action <sup>7 19-21</sup>. Substantial  
4 organisational and cultural barriers exist <sup>20 22 23 24</sup> and in order to overcome these  
5 barriers, both patients and professionals need to feel engaged, respected and  
6 treated as equals <sup>2 11 12 25 14 26 27</sup>. To date, there are numerous care concepts such  
7 as patient-centred care, individualized care and narrative medicine that touch  
8 upon patient involvement and partnership, all including some sort of reciprocity  
9 and shared knowledge <sup>28 29</sup>, self management <sup>30 31</sup> participation in decision  
10 making <sup>32</sup>. Different PCC frameworks lift patient involvement toward an  
11 enhanced therapeutic relationship that requires sharing power and  
12 responsibility <sup>6</sup>. Yet, as patients are increasingly offered more choice and  
13 involvement, researchers also describe circumstances where patients choose to  
14 decline participation, defer decisions or feel unable to participate <sup>33 34</sup>. It seems  
15 that the notion of the patient as an active partner in care requires empirical  
16 understanding and clarity.

17  
18  
19  
20  
21  
22  
23  
24  
25  
26  
27  
28 Cribb and Entwistle (2011) draw attention to the importance of an emotionally  
29 supportive patient-professional partnership to aid 'meaningful participation' and  
30 shared decision-making <sup>14</sup>. Relationships that are open ended and conversational  
31 are prioritised as well as professional virtues and patient capabilities. This  
32 approach takes into account the relational aspects of partnership, which pay  
33 attention to the mindfulness of professionals and the unique aspects of patients'  
34 lives <sup>5 35 36</sup>. However, although power sharing implies an egalitarian and  
35 meaningful patient-professional relationship <sup>29</sup>, the literature describes a  
36 hierarchy of relationships depicting the different levels of engagement,  
37 responsibility and shared goals <sup>31 37</sup>. This moves from the lowest level i.e.  
38 involvement towards participation and the highest level i.e. partnership <sup>32 37</sup>.  
39 Thoransdottir & Kristjansson (2014) elaborate on informal and formal  
40 relationships; the former describing the importance of human connectedness on  
41 the bottom tier and the latter involving shared agreements on decisions and  
42 documentation at the top <sup>31</sup>.

43  
44  
45  
46  
47  
48  
49  
50  
51  
52  
53  
54  
55  
56  
57  
58  
59  
60  
In this paper we use a Swedish initiative for implementing an evidence-based  
PCC model as a case study. The University of Gothenburg Centre for PCC (GPCC)

1  
2  
3 has introduced a new evidence based model<sup>38-41</sup>, supported by a programme of  
4 training and research, which has changed clinical practice.<sup>42</sup> This model consists  
5 of three 'routines' of PCC namely narrative, partnership and documentation <sup>39 42</sup>  
6  
7  
8 <sup>43</sup>. Partnership in the GPCC framework is the main routine that drives the PCC  
9 process. The patient's narrative paves the way for collaboration, and  
10 documentation safeguards this collaboration. The aim of this study is to explore  
11 the realities of partnership as perceived by patients and health professionals in  
12 everyday PCC practice.

## 16 METHODS

### 18 **Sample and design**

20  
21 This study adopted an interpretive approach employing qualitative semi-  
22 structured interviews. We used a purposive sampling strategy aiming at  
23 representation of several professional categories and patients (table 1). Four  
24 hospital wards at a large teaching hospital in west Sweden were chosen; these  
25 varied in size (18 to 36 hospital beds), specialization and patient group (patients  
26 with chronic and/or acute illness and from self-managing to bed-confined).  
27  
28  
29  
30  
31

#### 32 *Table 1 Description of practitioners and patient demography*

33  
34  
35  
36  
37 Each ward manager was contacted with information about the study and gave  
38 their consent. They were then asked to recruit a nurse, an assistant nurse and a  
39 physician, with experience of working with PCC, from their ward.  
40  
41

42  
43 Patients were eligible for enrolment into the study if they were cognisant, able to  
44 communicate in Swedish and admitted to a reference ward where PCC was being  
45 implemented. The patients were admitted for symptoms of chronic heart failure,  
46 chronic obstructive lung disease, infections, iron deficit, colorectal diseases such  
47 as ulcerative colitis, Crohn's disease, colon surgery and hepatological disease.  
48  
49  
50

51  
52 This reference ward had implemented PCC systematically following a 10 week  
53 extensive training course facilitated by GPCC following the PCC routines <sup>38</sup>.  
54  
55

56  
57 A nurse coordinator working on the ward provided eligible patients with the  
58 study information. Twenty-one patients volunteered to participate and gave  
59  
60

1  
2  
3 their informed consent to be contacted by the study team after discharge and to  
4 be interviewed about the care they had received. One patient was excluded when  
5 transferred from another ward to the reference ward, which hampered recall.  
6  
7

### 8 9 **Data collection**

10  
11  
12 The interview guide for practitioners included questions how PCC related to the  
13 everyday work of healthcare practitioners and its implementation. The interview  
14 guide used for patient interviews intended to elicit patients' experiences of care  
15 on the ward and their understanding of PCC (table 2).  
16  
17  
18

#### 19 20 *Table 2 Interview guide practitioners and patients*

21  
22  
23  
24 DL conducted 12 interviews with professionals, AW conducted 2, and a trained  
25 research assistant conducted 3 interviews with practitioners and all interviews  
26 with patients.  
27  
28

29  
30 All interviews were audio recorded, transcribed verbatim, anonymised and  
31 translated from Swedish into English. All interviewees were given a pseudonym  
32 to maintain anonymity (P for Patient, N for Nurses, M for Manager and MD for  
33 Physician). The regional ethics committee approved the study and all  
34 participants, prior to their interview, gave informed consent.  
35  
36  
37  
38  
39  
40  
41  
42  
43  
44  
45  
46  
47  
48  
49  
50  
51  
52  
53  
54  
55  
56  
57  
58  
59  
60

## Analysis

Interviews were thematically analysed, adopting some basic features of grounded theory. Interviews were analysed initially employing line-by-line coding and an inductive, intuitive reading of the transcripts. A combination of computer software (NVivo 9) and hand written methods were used and mind mapping to assist with the development of themes<sup>44</sup>. We then followed a deductive process to explore how the characteristics and components of partnership were experienced by professionals and patients. Transcripts were independently coded by LM, ON & DL, and discussed with the whole team in order to address differences and reach a consensus.

## Results

Two main themes were found: firstly informal aspects of partnership comprising two subthemes, proximity & receptiveness and building a personal connection/confidence. The second main theme was formal aspects of partnership having two subthemes, aspects of goal setting and care planning, and documentation.

### Informal aspects of partnership

#### *Proximity and receptiveness*

Professionals described engaging patients in conversation with the intention of respecting and listening to the patient dialogue, understanding the patient's situation, making a good start and building a close connection. Assistant nurses followed this process each morning and described feeling 'closer' to the patient, seeing and hearing aspects of the patient from a social, psychological and physical perspective and becoming their 'eyes and ears'. Professionals described using communication techniques such as posing open, straightforward questions, talking without distractions and not judging. A number of professionals felt this process aided partnership in subsequent meetings.

I think that I and the nurse get a great response from the patients, straight away, that they feel very comfortable in this. They know who to turn to. That they feel like they've been given a lot of time, even if it's not that long time, but the content of the appointment gives them that feeling. (MD1)



1  
2  
3 Many patients described positive feelings towards the receptiveness of staff and  
4 the atmosphere of the ward. Accounts of unhurried and immediate support with  
5 care provided in a caring and close manner were common.  
6  
7

8  
9 Not everyone sits down at your bedside, just a few of them do. Mostly  
10 they pull out chair or something to sit on. They are not on their way to  
11 another patient when they do that. It's more of a good opening; that we  
12 are sitting here now, talking, until we are finished doing that. (P1)  
13  
14  
15  
16  
17

18 Available and reliable professionals increased patients' comfort, with  
19 professionals described as thoughtful, open and warm, leading to patients feeling  
20 a sense of humanity, security, familiarity and trust.  
21  
22  
23

24 They say "Hi Paula!" and then they present themselves with their name  
25 and then the title comes. Already there they create an opportunity for  
26 dialogue. It's not "I'm nurse, good day." So at that point it feels like an  
27 openness and they simply and easily describe how my life will be in this  
28 room. (P2)  
29  
30  
31  
32  
33  
34

### 35 *Building a close connection and confidence*

36  
37 Professionals described listening in a more engaged way to patients' wishes and  
38 needs. They emphasised the importance of knowing how patients felt, what they  
39 thought, aspects of their personality and personal knowledge, described by one  
40 professional as 'life-luggage'. Patients were prompted to discuss personal  
41 interests and common topics. For most professionals finding common ground  
42 built trust, security and a collaborative relationship on a person-to-person level.  
43  
44  
45  
46  
47

48 You may talk about books or music, or common interests so that you're  
49 not only... You establish a relationship beyond the nurse-patient, and it  
50 becomes more like person to person. (N1)  
51  
52  
53

54 In keeping with professionals' aspirations, many patients felt listened to and  
55 acknowledged. Several felt known personally, for who they were and their  
56 individual needs.  
57  
58  
59  
60

1  
2  
3  
4  
5 They could ask ordinary questions about the everyday life. We could talk  
6 about summer houses, and pets, and kind of on that level. And that's... I  
7 think that's very important. I think so at least... one is feeling more as if  
8 you aren't just a patient among others. (P3)  
9  
10  
11  
12

### 13 **Formal partnership**

#### 14 *Goal setting and care planning*

15  
16 Professionals reported working in partnership with patients in formal ways by  
17 giving and exchanging information, updating, summarizing and care planning.  
18 For example, patients are encouraged to discuss aspects of their symptoms,  
19 treatment, diagnosis and discharge plans. A number of professionals described  
20 making a 'team decision', alternatively known as a health plan, in collaboration  
21 with patients. This acknowledged a person's capabilities and personal goals that  
22 were agreed, documented and given to the patient. This is in line with the PCC  
23 routine of safeguarding the partnership through agreed goals.  
24  
25  
26  
27  
28  
29  
30  
31

32  
33 The patient when at the hospital together with the nurse and the doctor  
34 decided what are the main issues: is it losing weight, is it anxiety, is it stop  
35 smoking or getting better medication or is it more training, physical  
36 activities, is it fear of training? And so on. So when they left the hospital  
37 they had this sheet where they had described their problem and it was  
38 just, it was their problem it was not a standard formula - the formula was  
39 standard but the questions and the wishes from the patient was personal  
40  
41  
42  
43  
44  
45 (MD2)  
46

47 Informal aspects of partnership led to an environment where it became possible  
48 for patients to ask questions, learn about their condition and treatment.  
49 Professionals believed patients had the inclination to begin caring for themselves,  
50 follow suggestions and instructions. Formal aspects such as discussing goals  
51 facilitated self-care such as getting dressed, mobilising on the ward, preparing  
52 for discharge and following advice post discharge.  
53  
54  
55  
56  
57  
58  
59  
60

1  
2  
3 Several professionals described the need to encourage, 'push' or 'pass' on  
4 competence to the patient, enabling the patient to become well informed,  
5 knowledgeable and take responsibility.  
6  
7

8  
9 There is a more practical understanding that the patient also carries a  
10 responsibility, and also is responsible for the process. I tend to think that  
11 my ward is at this stage of the process – to get the patient to understand  
12 the significance of his or her participation to activity, to rehabilitation.  
13  
14  
15 (M1)  
16  
17

18  
19 Professionals noticed a change, where patients who were well informed, knew  
20 they had an impact, influence and could handle themselves. They seemed  
21 satisfied and more willing to help themselves and 'buy the whole concept'.  
22  
23

24  
25 We look at what the patient usually does in their everyday life outside the  
26 hospital, and what the patient does right now, and what we can do to  
27 improve and to support that the patient becomes their ordinary self again.  
28 And that you really try to understand how they can use their own  
29 resources and train themselves. (N2)  
30  
31  
32  
33  
34  
35

36 However from the patient perspective some remembered taking part in  
37 developing a health plan but few mentioned goals and when discussed, these  
38 were invariably described in medicalised terms or framed around home  
39 circumstances for discharge. Personal information was elicited and described,  
40 but not necessarily orientated towards 'lifeworld' goals.  
41  
42  
43  
44

45 I don't actually know if the goal has been mentioned, but that might be the  
46 goal with the illness I have, that the goal is to be free from relapses.  
47 Because everything would then be as good as they can be. One wouldn't  
48 suffer from the disease then. As long as one eats medications that doesn't  
49 give side-effects and isn't suffering from relapses, then everything will be  
50 okay. And I know that has been mentioned, that it might be the goal after  
51 all. But that, as I said, that has to do with the disease. (P4)  
52  
53  
54  
55  
56  
57  
58  
59  
60

1  
2  
3 Patients felt they contributed when they discussed choices with professionals,  
4 helped themselves, used their initiative and became knowledgeable. There were  
5 opportunities to question, decline treatment and contribute to discharge  
6 planning. For some, participation involved discussing test results, investigations  
7 and medication management that helped them 'feel' (our emphasis) they were  
8 committed to taking part in their care. For example discussing an ultrasound  
9 test, a transfusion or a colonoscopy procedure. They received explanations and  
10 felt they knew what to do, how to deal with medication and treatments.  
11  
12

13  
14  
15 I know much more about my illness now and why it has become the way  
16 it has, I think I understand that better now. And that I can see in hindsight  
17 that I haven't been feeling well for a very long time, which has been  
18 connected to this. So now I have got a much clearer picture of my  
19 condition. (P5)  
20  
21  
22  
23  
24  
25  
26

27  
28 Others felt they participated by listening to professionals, agreeing and accepting  
29 professionals' decision-making. They felt confident, comfortable and treated as  
30 equals, described by one patient as 'horizontal communication'. A few patients  
31 described themselves as 'experienced', 'verbal' even when very ill and able to  
32 'demand and ask questions'. Yet for patients in this study, participating was  
33 described in terms of informed discussion, acceptance and agreement,  
34 participating up to a point or as far as they felt able. Several felt comfortable  
35 'submitting' and 'not being in the driving seat'.  
36  
37  
38  
39  
40

41  
42 Many times one might feel like one is participating... one sometimes may  
43 be silent, but still feel a fellowship. Do you understand what I mean? And  
44 that's probably what I felt with the ward. That I didn't need to ask or I  
45 didn't need to ask them, the nurses I mean, since I knew in some way that  
46 the community still was there. (P6)  
47  
48  
49  
50  
51  
52  
53  
54  
55  
56  
57  
58  
59  
60

### *Documentation*

Professionals described writing care plans with patients, eliciting biomedical information and discussing social and discharge planning. Decisions and plans were agreed and documented.

You should make a plan together with the patient and that you discuss with the patient and so on, but the difference of having it in this way is that you have more of a structure of it. You create a framework for what it means to work like this, so that what you're doing becomes more concrete. (MD3)

In some way the patient gets what we've done on paper, and we get a proof of that we understand it in the right way, so that the patient can say "Yes, this is how it was" or "I don't agree with this." The important thing is that you agree, so that you are on the same page so to speak. (N1)

In this respect professionals described 'a new practice' where patients were encouraged to actively participate, become more involved and take part in decisions about their care.

Documentation acted as a reminder for patients to discuss care on 'a new level'. (N3)

You must create a care plan for the patient within 48 hours and then you should write why they have sought care and what we have planned for them and this should be addressed at the round with the patient, and it is written down and then it's a little investigation to see what the patients can do themselves. (N4)

Professionals encouraged patients to use their own resources and expertise. For example patients were encouraged to prepare for conversations with the team and write down thoughts or questions.

Patients felt informed about their condition, discharge and future care needs, felt they were listened to and some felt they were participating in their care plan.

1  
2  
3 I think, that it felt like it was a team. Decisions where I participated in, and  
4 the care plan and such things. How much you actually were that, I don't  
5 know, but at least you had a picture of it, so. But I can't decide how I'm  
6 going to be treated or taken care of, but at least you can be a part of it and  
7 have opinions, you were able to do that. (P8)  
8  
9  
10

11  
12 Although patients remembered receiving written information and some  
13 described opportunities to write down thoughts, questions and contribute to  
14 their care, they did not remember the written information in any detail.  
15 Nevertheless, patients saw this documentation in 'simple' terms whereby they  
16 felt taken care of and in receipt of sufficient information.  
17  
18  
19

## 20 21 Discussion

22  
23 In our study, interviewees' accounts reflect levels of mutuality, self-expression  
24 and respect that lay the groundwork for PCC and indicate a move from disease  
25 focused models of care<sup>19</sup>. In keeping with the literature we suggest that informal  
26 elements of partnership provide the conditions for communication and mutual  
27 co-operation upon which formal relations of partnership can be constructed<sup>27 31</sup>  
28<sup>36</sup>. Professional and patient perspectives highlight the importance of the informal  
29 elements of partnership for ultimately determining the level of shared decision  
30 making which is possible to aspire to and practically achieve<sup>14</sup>. Informal  
31 elements in our study depict emotionally supportive relationships that pave the  
32 way for patients to participate, once the scene is set and the circumstances feel  
33 right.  
34  
35  
36  
37  
38  
39  
40  
41  
42  
43

44 However, in our findings patients were content to be able to ask questions and  
45 receive information. They perceived participation as informed discussion and  
46 agreement, deferring to professional knowledge and expertise and not  
47 necessarily describing opportunities for empowerment and activation. Perceived  
48 competence of professionals seemed enough for patients and whilst patients  
49 prioritised the informal processes where 'good care' may have been interpreted  
50 as PCC, professionals prioritised outcomes that were formal and documented.  
51 Patients described participating in plans for discharge but did not describe  
52 notions of enablement or control. As with other studies, patients were satisfied  
53  
54  
55  
56  
57  
58  
59  
60

1  
2  
3 with a personal approach and a positive partnership with professionals who  
4 communicated empathetically and effectively<sup>45</sup> with professionals acting as  
5 educators, building mutual and collaborative partnerships<sup>46</sup>. Measurements of  
6 optimum patient-professional relationships and person-centredness need to  
7 consider patients' emotional and personal responses that highlight the process  
8 rather than the outcome of interactions with health professionals<sup>5 14 27 35</sup>.  
9  
10 Aspects of informal and formal partnership appeared to act as antecedents of  
11 patient participation. Yet overall, most patients portrayed a taken-for-granted  
12 pragmatism, trusting professionals with expertise and competence to make  
13 overall decisions in a caring environment. For patients in this study, PCC was not  
14 explicitly understood or described as an opportunity to formalize a partnership  
15 with professionals in order to actively participate in their care. There were  
16 relational, contextual and emotional factors for partnership that took precedence  
17 in patients' minds. In addition, professionals may have considered PCC as a  
18 particular professional approach rather than a systematic endeavour to "invite"  
19 patients to participate in the PCC routines and explicate the model.  
20  
21  
22  
23  
24  
25  
26  
27  
28  
29  
30

31 Aspects of partnership, particularly informal aspects, led patients to leave some  
32 decisions to the professionals since they felt cared for and well informed. In this  
33 respect patients' interpretation of participation can be viewed, not as passive  
34 submission or deferment to professional expertise and knowledge, but a  
35 common understanding reached through a therapeutic relationship. Our  
36 interpretation of the present study points toward the importance of human  
37 connectedness and the feeling of being listen to and acknowledged as a person  
38 (informal aspect) for patients, while routines and formal aspects of care came  
39 more into the foreground for the practitioners. It seems as if in order to  
40 integrate the patient into clinical practice, there seems to be a balancing act that  
41 practitioners as well as patients need to reflect upon: recognition of the patient  
42 as a person (informal aspects) needs to balance the specific practical routines  
43 (formal aspects)<sup>42</sup>. The risk could otherwise be that the patient as a person  
44 becomes a "check box" in a routine, which in many aspects would entrench  
45 profession-centred care rather than person-centredness.  
46  
47  
48  
49  
50  
51  
52  
53  
54  
55  
56  
57  
58  
59  
60

1  
2  
3 This study has some limitations. Patients did not necessarily perceive their care  
4 in the context of a PCC model and our study depended upon patients  
5 remembering events and perhaps perceiving the relevance of information and  
6 care strategies. Secondly, because the study took place in an particular  
7 institutional context (GPCC) in Sweden, the findings may not be transferable to  
8 other settings. Moreover, formal aspects of partnership, for example,  
9 documented care plans and decisions, could have provided patients with  
10 opportunities to revisit decisions in written form, and maintain a sense of  
11 confidence and trust during their admission that was taken for granted.  
12 Moreover, most interviewees were older perhaps predisposing them to comply  
13 with professional expertise or feel knowledgeable but not necessarily  
14 empowered <sup>47</sup>.

#### 24 Conclusion

25  
26 In our study patients appear to value a process of human connectedness above  
27 and beyond formal aspects of taking part and feeling activated and capable.  
28 These findings may point to the need for professionals to acknowledge the  
29 importance of the human connectedness that is as crucial as formal aspects for  
30 PCC to be fully realised in practice.  
31  
32  
33

#### 36 Author contributions

37 LM and AW contributed equally to the study as first authors. All authors  
38 contributed to the study design, conception and development. DL and AW  
39 conducted the interviews together with research assistant Marie Hammer. LM,  
40 DL and ÖN initially analysed the data, and all authors met face to face and over  
41 skype as a group to discuss, revise and confirm the findings. All authors were  
42 responsible for critical revision and finalising the manuscript.  
43  
44  
45  
46  
47

#### 49 Competing interest

50 Nicky Britten is a member of the Scientific Advisory Board of GPCC. The  
51 author(s) declared no potential conflicts of interest with respect to the research,  
52 authorship, and/or publication of this article.  
53  
54  
55  
56  
57  
58  
59  
60



### Funding

The study was funded by the Centre for Person-Centred Care (GPCC) and LETStudio at the University of Gothenburg, Sweden. Nicky Britten was partially supported by the National Institute for Health Research (NIHR) Collaboration for Leadership in Applied Health Research and Care South West Peninsula. The views expressed are those of the authors and not necessarily those of the NHS, the NIHR or the Department of Health. The authors are grateful to the interviewees for their willingness to participate in the study.

### Data sharing statement

No additional unpublished data is available

Wordcount 3560

### References

1. Elwyn G, Frosch D, Thomson R, et al. Shared decision making: a model for clinical practice. *J Gen Intern Med* 2012;27(10):1361-7. doi: 10.1007/s11606-012-2077-6 [published Online First: 2012/05/24]
2. Elwyn G, Lloyd A, May C, et al. Collaborative deliberation: a model for patient care. *Patient Educ Couns* 2014;97(2):158-64. doi: 10.1016/j.pec.2014.07.027 [published Online First: 2014/09/02]
3. Department of Health. Long term conditions compendium of information, 2012.
4. Eaton S, Roberts S, Turner B. Delivering person centred care in long term conditions. *Bmj* 2015;350:h181. doi: 10.1136/bmj.h181 [published Online First: 2015/02/12]
5. Epstein RM, Street RL, Jr. The values and value of patient-centered care. *Ann Fam Med* 2011;9(2):100-3. doi: 10.1370/afm.1239 [published Online First: 2011/03/16]
6. Harding E, Wait S, Scrutton J. The state of play in person-centred care: pragmatic review of how person-centred care is defined, applied and measured, featuring selected key contributors and case studies across the field.: The Health Foundation, 2015:1-140.
7. Hawkes N. Seeing things from the patients' view: what will it take? *Bmj* 2015;350:g7757. doi: 10.1136/bmj.g7757 [published Online First: 2015/02/12]
8. Health Foundation. Helping people help themselves, 2011.
9. King's Fund. People in control of their own health and care, 2014.

10. NHS England. Enhancing the quality of life for people living with long term conditions-the house of care, 2014.
11. Coulter A. Patient engagement--what works? *J Ambul Care Manage* 2012;35(2):80-9. doi: 10.1097/JAC.0b013e318249e0fd [published Online First: 2012/03/15]
12. Coulter A, Collins A. Making shared decision-making a reality; no decision about me, without me. London: The King's Fund, 2011:1-40.
13. Coulter A, Safran D, Wasson JH. On the language and content of patient engagement. *J Ambul Care Manage* 2012;35(2):78-9. doi: 10.1097/JAC.0b013e31824a5676 [published Online First: 2012/03/15]
14. Cribb A, Entwistle VA. Shared decision making: trade-offs between narrower and broader conceptions. *Health Expect* 2011;14(2):210-9. doi: 10.1111/j.1369-7625.2011.00694.x
15. Makoul G, Clayman ML. An integrative model of shared decision making in medical encounters. *Patient Educ Couns* 2006;60(3):301-12. doi: 10.1016/j.pec.2005.06.010
16. Amin F. Commentary: Becoming a person centred practice. *Bmj* 2015;350:h269. doi: 10.1136/bmj.h269 [published Online First: 2015/02/12]
17. National Voices. Principles of care and support planning, 2013.
18. Coulter A, Entwistle VA, Eccles A, et al. Personalised care planning for adults with chronic or long-term health conditions. *Cochrane Database Syst Rev* 2015;3:CD010523. doi: 10.1002/14651858.CD010523.pub2 [published Online First: 2015/03/04]
19. Ekman I, Swedberg K, Taft C, et al. Person-centered care--ready for prime time. *Eur J Cardiovasc Nurs* 2011;10(4):248-51. doi: 10.1016/j.ejcnurse.2011.06.008 [published Online First: 2011/07/19]
20. Frosch DL. The patient is the most important member of the team. *Bmj* 2015;350:g7767. doi: 10.1136/bmj.g7767 [published Online First: 2015/02/12]
21. Frosch DL, May SG, Rendle KA, et al. Authoritarian physicians and patients' fear of being labeled 'difficult' among key obstacles to shared decision making. *Health Aff (Millwood)* 2012;31(5):1030-8. doi: 10.1377/hlthaff.2011.0576 [published Online First: 2012/05/09]
22. Moore L, Britten N, Lydahl D, et al. Barriers and facilitators to the implementation of person-centred care in different healthcare contexts. *Scand J Caring Sci* 2016 doi: 10.1111/scs.12376
23. Naldemirci O, Lydahl D, Britten N, et al. Tenacious assumptions of person-centred care? Exploring tensions and variations in practice. *Health (London)* 2016 doi: 10.1177/1363459316677627
24. Alharbi TS, Ekman I, Olsson LE, et al. Organizational culture and the implementation of person centered care: results from a change process in Swedish hospital care. *Health Policy* 2012;108(2-3):294-301. doi: 10.1016/j.healthpol.2012.09.003
25. Gravel K, Legare F, Graham ID. Barriers and facilitators to implementing shared decision-making in clinical practice: a systematic review of health professionals' perceptions. *Implement Sci* 2006;1:16. doi: 10.1186/1748-5908-1-16 [published Online First: 2006/08/11]

- 1
  - 2
  - 3
  - 4
  - 5
  - 6
  - 7
  - 8
  - 9
  - 10
  - 11
  - 12
  - 13
  - 14
  - 15
  - 16
  - 17
  - 18
  - 19
  - 20
  - 21
  - 22
  - 23
  - 24
  - 25
  - 26
  - 27
  - 28
  - 29
  - 30
  - 31
  - 32
  - 33
  - 34
  - 35
  - 36
  - 37
  - 38
  - 39
  - 40
  - 41
  - 42
  - 43
  - 44
  - 45
  - 46
  - 47
  - 48
  - 49
  - 50
  - 51
  - 52
  - 53
  - 54
  - 55
  - 56
  - 57
  - 58
  - 59
  - 60
26. Entwistle VA. Considerations of 'fit' and patient involvement in decision making. *Health Expect* 2006;9(2):95-7. doi: 10.1111/j.1369-7625.2006.00397.x
27. Entwistle VA, Watt IS. Patient involvement in treatment decision-making: the case for a broader conceptual framework. *Patient Educ Couns* 2006;63(3):268-78. doi: 10.1016/j.pec.2006.05.002
28. Hudon C, Fortin M, Haggerty J, et al. Patient-centered care in chronic disease management: a thematic analysis of the literature in family medicine. *Patient Educ Couns* 2012;88(2):170-6. doi: 10.1016/j.pec.2012.01.009
29. Mead N, Bower P. Patient-centredness: a conceptual framework and review of the empirical literature. *Soc Sci Med* 2000;51(7):1087-110.
30. Sahlsten MJ, Larsson IE, Sjostrom B, et al. An analysis of the concept of patient participation. *Nurs Forum* 2008;43(1):2-11. doi: 10.1111/j.1744-6198.2008.00090.x
31. Thorarinsdottir K, Kristjansson K. Patients' perspectives on person-centred participation in health care: A framework analysis. *Nursing ethics* 2013 doi: 10.1177/0969733013490593
32. Frank C, Asp M, Dahlberg K. Patient participation in emergency care - a phenomenographic analysis of caregivers' conceptions. *J Clin Nurs* 2009;18(18):2555-62. doi: 10.1111/j.1365-2702.2008.02477.x
33. Eldh AC, Ehnfors M, Ekman I. The phenomena of participation and non-participation in health care--experiences of patients attending a nurse-led clinic for chronic heart failure. *Eur J Cardiovasc Nurs* 2004;3(3):239-46. doi: 10.1016/j.ejcnurse.2004.05.001
34. Eldh AC, Ekman I, Ehnfors M. Conditions for patient participation and non-participation in health care. *Nursing ethics* 2006;13(5):503-14.
35. Epstein RM. Making communication research matter: what do patients notice, what do patients want, and what do patients need? *Patient Educ Couns* 2006;60(3):272-8. doi: 10.1016/j.pec.2005.11.003
36. Epstein RM, Franks P, Fiscella K, et al. Measuring patient-centered communication in patient-physician consultations: theoretical and practical issues. *Soc Sci Med* 2005;61(7):1516-28. doi: 10.1016/j.socscimed.2005.02.001
37. Cahill J. Patient participation: a concept analysis. *J Adv Nurs* 1996;24(3):561-71.
38. Ekman I, Wolf A, Olsson LE, et al. Effects of person-centred care in patients with chronic heart failure: the PCC-HF study. *Eur Heart J* 2012;33(9):1112-9. doi: 10.1093/eurheartj/ehr306 [published Online First: 2011/09/20]
39. Fors A, Ekman I, Taft C, et al. Person-centred care after acute coronary syndrome, from hospital to primary care - A randomised controlled trial. *International journal of cardiology* 2015;187:693-9. doi: 10.1016/j.ijcard.2015.03.336 [published Online First: 2015/04/29]
40. Feldthusen C, Dean E, Forsblad-d'Elia H, et al. Effects of person-centered physical therapy on fatigue-related variables in persons with rheumatoid arthritis: a randomized controlled trial. *Arch Phys Med Rehabil* 2016;97(1):26-36.
41. Olsson LE, Hansson E, Ekman I. Evaluation of person-centred care after hip replacement-a controlled before and after study on the effects of fear of

- 1  
2  
3 movement and self-efficacy compared to standard care. *BMC nursing*  
4 2016;15(1):53. doi: 10.1186/s12912-016-0173-3  
5 42. Britten N, Moore L, Lydahl D, et al. Elaboration of the Gothenburg model of  
6 person-centred care. *Health Expect* 2016 doi: 10.1111/hex.12468  
7 [published Online First: 2016/05/20]  
8 43. Ekman I, Hedman H, Swedberg K, et al. Commentary: Swedish initiative on  
9 person centred care. *Bmj* 2015;350:h160. doi: 10.1136/bmj.h160  
10 [published Online First: 2015/02/12]  
11 44. Miles MB, Huberman AM, Saldana J. Qualitative data analysis: A methods  
12 sourcebook. Third ed. London: Sage Publications 2014.  
13 45. Little P, Everitt H, Williamson I, et al. Observational study of effect of patient  
14 centredness and positive approach on outcomes of general practice  
15 consultations. *BMJ* 2001;323(7318):908-11. [published Online First:  
16 2001/10/23]  
17 46. Roter D. The enduring and evolving nature of the patient-physician  
18 relationship. *Patient Educ Couns* 2000;39(1):5-15.  
19 47. Joseph-Williams N, Elwyn G, Edwards A. Knowledge is not power for  
20 patients: a systematic review and thematic synthesis of patient-reported  
21 barriers and facilitators to shared decision making. *Patient Educ Couns*  
22 2014;94(3):291-309. doi: 10.1016/j.pec.2013.10.031 [published Online  
23 First: 2013/12/07]  
24  
25  
26  
27  
28  
29  
30  
31  
32  
33  
34  
35  
36  
37  
38  
39  
40  
41  
42  
43  
44  
45  
46  
47  
48  
49  
50  
51  
52  
53  
54  
55  
56  
57  
58  
59  
60

**Table 1**

| Practitioners (n=17) |                 |
|----------------------|-----------------|
| Women (n)            | 14              |
| Profession           |                 |
| Registered nurse     | 5               |
| Assistant nurse      | 4               |
| Manager              | 4               |
| Physician            | 4               |
| Interview range      | 29-60 minutes   |
| Place for interview  |                 |
| Hospital             | 13              |
| Primary care center  | 2               |
| University           | 2               |
| Patient (n=20)       |                 |
| Women (n)            | 11              |
| Age median (range)   | 69, 35-88 years |
| Interview range      | 19-83 minutes   |
| Place for interview  |                 |
| Home                 | 13              |
| Hospital             | 2               |
| University           | 1               |
| Telephone            | 4               |

**Table 2**

| Interview guide: Practitioners | Interview guide: Patients |
|--------------------------------|---------------------------|
|--------------------------------|---------------------------|

|                                                                                                                                                                                                                                                                                                                                                                                                                                                                                                                                                                                                                                                                                                                                                                                                                                                                                                                                                                                                                                                                                                                                                                                                                                                                                                                                                                                                                                                                                                                                                                                                                                                                                                                                                                                                                                                                                                                                                                                                                                                                                                                                                                                                                                                                                                                                                                                                                             |                                                                                                                                                                                                                                                                                                                                                                                                                                                                                                                                                                                                                                                                                                                                                                                                                                                                                                                                                                                                                                                                                                                                                                                                                                                                                                                                                                                                                                                                                                                                                                                                                                                                                                                                                                                                                                                                                                                                                                                                                                                                                                                                                                                                                                                                                                                                                               |
|-----------------------------------------------------------------------------------------------------------------------------------------------------------------------------------------------------------------------------------------------------------------------------------------------------------------------------------------------------------------------------------------------------------------------------------------------------------------------------------------------------------------------------------------------------------------------------------------------------------------------------------------------------------------------------------------------------------------------------------------------------------------------------------------------------------------------------------------------------------------------------------------------------------------------------------------------------------------------------------------------------------------------------------------------------------------------------------------------------------------------------------------------------------------------------------------------------------------------------------------------------------------------------------------------------------------------------------------------------------------------------------------------------------------------------------------------------------------------------------------------------------------------------------------------------------------------------------------------------------------------------------------------------------------------------------------------------------------------------------------------------------------------------------------------------------------------------------------------------------------------------------------------------------------------------------------------------------------------------------------------------------------------------------------------------------------------------------------------------------------------------------------------------------------------------------------------------------------------------------------------------------------------------------------------------------------------------------------------------------------------------------------------------------------------------|---------------------------------------------------------------------------------------------------------------------------------------------------------------------------------------------------------------------------------------------------------------------------------------------------------------------------------------------------------------------------------------------------------------------------------------------------------------------------------------------------------------------------------------------------------------------------------------------------------------------------------------------------------------------------------------------------------------------------------------------------------------------------------------------------------------------------------------------------------------------------------------------------------------------------------------------------------------------------------------------------------------------------------------------------------------------------------------------------------------------------------------------------------------------------------------------------------------------------------------------------------------------------------------------------------------------------------------------------------------------------------------------------------------------------------------------------------------------------------------------------------------------------------------------------------------------------------------------------------------------------------------------------------------------------------------------------------------------------------------------------------------------------------------------------------------------------------------------------------------------------------------------------------------------------------------------------------------------------------------------------------------------------------------------------------------------------------------------------------------------------------------------------------------------------------------------------------------------------------------------------------------------------------------------------------------------------------------------------------------|
| <p>1</p> <p>2</p> <p>3</p> <p>4</p> <p>5</p> <p>6</p> <p>7</p> <p>8</p> <p>9</p> <p>10</p> <p>11</p> <p>12</p> <p>13</p> <p>14</p> <p>15</p> <p>16</p> <p>17</p> <p>18</p> <p>19</p> <p>20</p> <p>21</p> <p>22</p> <p>23</p> <p>24</p> <p>25</p> <p>26</p> <p>27</p> <p>28</p> <p>29</p> <p>30</p> <p>31</p> <p>32</p> <p>33</p> <p>34</p> <p>35</p> <p>36</p> <p>37</p> <p>38</p> <p>39</p> <p>40</p> <p>41</p> <p>42</p> <p>43</p> <p>44</p> <p>45</p> <p>46</p> <p>47</p> <p>48</p> <p>49</p> <p>50</p> <p>51</p> <p>52</p> <p>53</p> <p>54</p> <p>55</p> <p>56</p> <p>57</p> <p>58</p> <p>59</p> <p>60</p> <ul style="list-style-type: none"> <li>• To start with, could you tell me a bit about this ward/clinic/centre?</li> </ul> <p><b>Prompts:</b> Size? Practical work? Team?</p> <ul style="list-style-type: none"> <li>• How did you start working with PCC?</li> </ul> <p><b>Prompts:</b> First contact with PCC? When did you first hear about it? Where did the idea come from? Did you have a special training?</p> <ul style="list-style-type: none"> <li>• How did you implement PCC in the ward/clinic/centre? What did the implementation look like?</li> <li>• Could you tell me about a regular day at work with PCC?</li> <li>• Tell me about your practice and experiences with PCC on this ward/clinic/centre?</li> <li>• How would you describe PCC to someone who is coming to work with you on your ward/center?</li> </ul> <p><b>Prompts:</b> How would you describe or define PCC?</p> <ul style="list-style-type: none"> <li>• How did patients react to PCC?</li> <li>• Would you tell me about any changes to your practice since you started working with PCC?</li> </ul> <p><b>Prompts:</b> Were there any changes in your ways of working? Relations with patients? Routines? Division of labour? Any changes-adaptions?</p> <ul style="list-style-type: none"> <li>• What kind of documentation do you use when you work with PCC? Do you use any tools, diaries, notebooks, written material as part of PCC during your day? Can you describe this for me? How do you use this documentation for PCC in your work?</li> <li>• What kinds of conditions do you think are required for PCC?</li> <li>• What kinds of things do you think helped PCC and what kinds of things made PCC difficult in your experience?</li> <li>• Is there anything else you would like to add?</li> </ul> | <ul style="list-style-type: none"> <li>• Could you tell me about your experience of the care you received? How would you describe the care and treatment?</li> </ul> <p><b>Prompts:</b> Can you give examples of the kind of care you received? What did the routines look like?</p> <ul style="list-style-type: none"> <li>• How have you experienced the relationship between you and the staff? How did you experience the communication between you and the staff?</li> </ul> <p><b>Prompts:</b> In which ways, did you receive information? Did you discuss your care and treatment with the staff? Did the staff listen to your concerns and questions?</p> <ul style="list-style-type: none"> <li>• What has been important to you in the care that you got?</li> </ul> <p><b>Prompts:</b> How did you you participate in decisions, have you been seen and listened to, information and communication about your care and treatment? Do you think that your resources/knowledge have been utilized?</p> <ul style="list-style-type: none"> <li>• Do you think that the care you received was different from that of the care experience you have had in the past and ( if applicable) the care that you received later?</li> </ul> <p><b>Prompts:</b> In what way did they differ? What changes have you noticed?</p> <ul style="list-style-type: none"> <li>• Are you familiar with the term person-centered care?</li> </ul> <p><b>Prompts:</b> If so, how would you describe PCC?</p> <ul style="list-style-type: none"> <li>• During the care process, which part(s) of the care and treatment received do you perceive were person-centred?</li> <li>• Which parts of PCC meant the most to your experience of involvement / partnership</li> </ul> <p><b>Prompts:</b> Could you give some examples? Procedures? Documentation? How staff looked after you? Something else?</p> <ul style="list-style-type: none"> <li>• Do you think that health professionals have been interested in you as a person?</li> <li>• Did you use an electronic health diary via the app or the web?</li> </ul> <p><b>Prompts:</b> How important was it for you? If not, did you use any other form of documentation tools or aids that had meaning for you?</p> <ul style="list-style-type: none"> <li>• Is there anything else you would like to add?</li> </ul> |
|-----------------------------------------------------------------------------------------------------------------------------------------------------------------------------------------------------------------------------------------------------------------------------------------------------------------------------------------------------------------------------------------------------------------------------------------------------------------------------------------------------------------------------------------------------------------------------------------------------------------------------------------------------------------------------------------------------------------------------------------------------------------------------------------------------------------------------------------------------------------------------------------------------------------------------------------------------------------------------------------------------------------------------------------------------------------------------------------------------------------------------------------------------------------------------------------------------------------------------------------------------------------------------------------------------------------------------------------------------------------------------------------------------------------------------------------------------------------------------------------------------------------------------------------------------------------------------------------------------------------------------------------------------------------------------------------------------------------------------------------------------------------------------------------------------------------------------------------------------------------------------------------------------------------------------------------------------------------------------------------------------------------------------------------------------------------------------------------------------------------------------------------------------------------------------------------------------------------------------------------------------------------------------------------------------------------------------------------------------------------------------------------------------------------------------|---------------------------------------------------------------------------------------------------------------------------------------------------------------------------------------------------------------------------------------------------------------------------------------------------------------------------------------------------------------------------------------------------------------------------------------------------------------------------------------------------------------------------------------------------------------------------------------------------------------------------------------------------------------------------------------------------------------------------------------------------------------------------------------------------------------------------------------------------------------------------------------------------------------------------------------------------------------------------------------------------------------------------------------------------------------------------------------------------------------------------------------------------------------------------------------------------------------------------------------------------------------------------------------------------------------------------------------------------------------------------------------------------------------------------------------------------------------------------------------------------------------------------------------------------------------------------------------------------------------------------------------------------------------------------------------------------------------------------------------------------------------------------------------------------------------------------------------------------------------------------------------------------------------------------------------------------------------------------------------------------------------------------------------------------------------------------------------------------------------------------------------------------------------------------------------------------------------------------------------------------------------------------------------------------------------------------------------------------------------|

## COREQ (COnsolidated criteria for REporting Qualitative research) Checklist

A checklist of items that should be included in reports of qualitative research. You must report the page number in your manuscript where you consider each of the items listed in this checklist. If you have not included this information, either revise your manuscript accordingly before submitting or note N/A.

| Topic                                          | Item No. | Guide Questions/Description                                                                                                                              | Reported on Page No. |
|------------------------------------------------|----------|----------------------------------------------------------------------------------------------------------------------------------------------------------|----------------------|
| <b>Domain 1: Research team and reflexivity</b> |          |                                                                                                                                                          |                      |
| <i>Personal characteristics</i>                |          |                                                                                                                                                          |                      |
| Interviewer/facilitator                        | 1        | Which author/s conducted the interview or focus group?                                                                                                   | P. 6) DL, AW         |
| Credentials                                    | 2        | What were the researcher's credentials? E.g. PhD, MD                                                                                                     | N/A                  |
| Occupation                                     | 3        | What was their occupation at the time of the study?                                                                                                      | N/A                  |
| Gender                                         | 4        | Was the researcher male or female?                                                                                                                       | P. 1) 50% of th      |
| Experience and training                        | 5        | What experience or training did the researcher have?                                                                                                     | N/A                  |
| <i>Relationship with participants</i>          |          |                                                                                                                                                          |                      |
| Relationship established                       | 6        | Was a relationship established prior to study commencement?                                                                                              | P 5)                 |
| Participant knowledge of the interviewer       | 7        | What did the participants know about the researcher? e.g. personal goals, reasons for doing the research                                                 | N/A                  |
| Interviewer characteristics                    | 8        | What characteristics were reported about the inter viewer/facilitator? e.g. Bias, assumptions, reasons and interests in the research topic               | N/A                  |
| <b>Domain 2: Study design</b>                  |          |                                                                                                                                                          |                      |
| <i>Theoretical framework</i>                   |          |                                                                                                                                                          |                      |
| Methodological orientation and Theory          | 9        | What methodological orientation was stated to underpin the study? e.g. grounded theory, discourse analysis, ethnography, phenomenology, content analysis | P 7) Interviews      |
| <i>Participant selection</i>                   |          |                                                                                                                                                          |                      |
| Sampling                                       | 10       | How were participants selected? e.g. purposive, convenience, consecutive, snowball                                                                       | P. 5) a purposi      |
| Method of approach                             | 11       | How were participants approached? e.g. face-to-face, telephone, mail, email                                                                              | P 20 Table 1)        |
| Sample size                                    | 12       | How many participants were in the study?                                                                                                                 | P 6) 37 respon       |
| Non-participation                              | 13       | How many people refused to participate or dropped out? Reasons?                                                                                          | P 6) One patie       |
| <i>Setting</i>                                 |          |                                                                                                                                                          |                      |
| Setting of data collection                     | 14       | Where was the data collected? e.g. home, clinic, workplace                                                                                               | P 20, Table 1)       |
| Presence of non-participants                   | 15       | Was anyone else present besides the participants and researchers?                                                                                        | N/A                  |
| Description of sample                          | 16       | What are the important characteristics of the sample? e.g. demographic data, date                                                                        | P20, Table 1) 4      |
| <i>Data collection</i>                         |          |                                                                                                                                                          |                      |
| Interview guide                                | 17       | Were questions, prompts, guides provided by the authors? Was it pilot tested?                                                                            | P 21, Table 2)       |
| Repeat interviews                              | 18       | Were repeat inter views carried out? If yes, how many?                                                                                                   | N/A                  |
| Audio/visual recording                         | 19       | Did the research use audio or visual recording to collect the data?                                                                                      | P.6) Audio recd      |
| Field notes                                    | 20       | Were field notes made during and/or after the inter view or focus group?                                                                                 | N/A                  |
| Duration                                       | 21       | What was the duration of the inter views or focus group?                                                                                                 | P20, Table 1) E      |
| Data saturation                                | 22       | Was data saturation discussed?                                                                                                                           | N/A                  |
| Transcripts returned                           | 23       | Were transcripts returned to participants for comment and/or                                                                                             | N/A                  |

| Topic                                  | Item No. | Guide Questions/Description                                                                                                        | Reported on Page No. |
|----------------------------------------|----------|------------------------------------------------------------------------------------------------------------------------------------|----------------------|
|                                        |          | correction?                                                                                                                        |                      |
| <b>Domain 3: analysis and findings</b> |          |                                                                                                                                    |                      |
| <i>Data analysis</i>                   |          |                                                                                                                                    |                      |
| Number of data coders                  | 24       | How many data coders coded the data?                                                                                               | P 15)                |
| Description of the coding tree         | 25       | Did authors provide a description of the coding tree?                                                                              | N/A                  |
| Derivation of themes                   | 26       | Were themes identified in advance or derived from the data?                                                                        | P 7) Derived fr      |
| Software                               | 27       | What software, if applicable, was used to manage the data?                                                                         | P 7)                 |
| Participant checking                   | 28       | Did participants provide feedback on the findings?                                                                                 | N/A                  |
| <i>Reporting</i>                       |          |                                                                                                                                    |                      |
| Quotations presented                   | 29       | Were participant quotations presented to illustrate the themes/findings?<br>Was each quotation identified? e.g. participant number | P7-P13)              |
| Data and findings consistent           | 30       | Was there consistency between the data presented and the findings?                                                                 | N/A                  |
| Clarity of major themes                | 31       | Were major themes clearly presented in the findings?                                                                               | P 7)                 |
| Clarity of minor themes                | 32       | Is there a description of diverse cases or discussion of minor themes?                                                             | N/A                  |

Developed from: Tong A, Sainsbury P, Craig J. Consolidated criteria for reporting qualitative research (COREQ): a 32-item checklist for interviews and focus groups. *International Journal for Quality in Health Care*. 2007. Volume 19, Number 6: pp. 349 – 357

**Once you have completed this checklist, please save a copy and upload it as part of your submission. DO NOT include this checklist as part of the main manuscript document. It must be uploaded as a separate file.**



# BMJ Open

## The realities of partnership in person-centred care: a qualitative interview study with patients and professionals

|                                 |                                                                                                                                                                                                                                                                                                                                                                                                                                                                                                                                                                                                                            |
|---------------------------------|----------------------------------------------------------------------------------------------------------------------------------------------------------------------------------------------------------------------------------------------------------------------------------------------------------------------------------------------------------------------------------------------------------------------------------------------------------------------------------------------------------------------------------------------------------------------------------------------------------------------------|
| Journal:                        | <i>BMJ Open</i>                                                                                                                                                                                                                                                                                                                                                                                                                                                                                                                                                                                                            |
| Manuscript ID                   | bmjopen-2017-016491.R1                                                                                                                                                                                                                                                                                                                                                                                                                                                                                                                                                                                                     |
| Article Type:                   | Research                                                                                                                                                                                                                                                                                                                                                                                                                                                                                                                                                                                                                   |
| Date Submitted by the Author:   | 10-Apr-2017                                                                                                                                                                                                                                                                                                                                                                                                                                                                                                                                                                                                                |
| Complete List of Authors:       | <p>Wolf, Axel; Health and Care Sciences, Sahlgrenska academy, University of Gothenburg; Centre for Person-Centred Care (GPCC), University of Gothenburg</p> <p>Moore, Lucy; University of Exeter Medical School, Institute for Health Research</p> <p>Lydahl, Doris; Department of Sociology and Work Science, University of Gothenburg</p> <p>Naldemirci, Öncel; Department of Sociology and Work Sciences, University of Gothenburg</p> <p>Elam, Mark; Department of Sociology and Work Science, University of Gothenburg,</p> <p>Britten, Nicky; University of Exeter Medical School, Institute for Health Research</p> |
| <b>Primary Subject Heading</b>: | Health services research                                                                                                                                                                                                                                                                                                                                                                                                                                                                                                                                                                                                   |
| Secondary Subject Heading:      | Qualitative research, Nursing, Medical management, Evidence based practice                                                                                                                                                                                                                                                                                                                                                                                                                                                                                                                                                 |
| Keywords:                       | person-centred care, patient participation, partnership, patient-centered care                                                                                                                                                                                                                                                                                                                                                                                                                                                                                                                                             |
|                                 |                                                                                                                                                                                                                                                                                                                                                                                                                                                                                                                                                                                                                            |

SCHOLARONE™  
Manuscripts

# The realities of partnership in person-centred care: a qualitative interview study with patients and professionals

Axel Wolf<sup>1,2\*</sup>, Lucy Moore<sup>4</sup>, Doris Lydahl<sup>3</sup>, Öncel Naldemirci<sup>3</sup>, Mark Elam<sup>3</sup>, Nicky Britten<sup>4</sup>,

1 Institute of Health Care Sciences, Sahlgrenska Academy, University of Gothenburg, Gothenburg, Sweden

2 Gothenburg Centre for Person Centred Care (GPCC), University of Gothenburg, Gothenburg, Sweden

3 Department of Sociology and Work Sciences, University of Gothenburg, Gothenburg, Sweden

4 University of Exeter Medical School, Institute for Health Research, Exeter, UK

Corresponding author:

Axel Wolf, Institute of Health Care Sciences, Sahlgrenska Academy, University of Gothenburg, Gothenburg, Sweden.

E-mail: axel.wolf@gu.se

Phone: +46 (0)31-7866034

Fax: +46 (0) 31-7866050

## ABSTRACT

**Objective:** Although conceptual definitions of person-centred care (PCC) vary, most models value the active involvement of patients through patient-

1  
2  
3 professional partnerships. However, while this may increase patients' sense of  
4 responsibility and control, research is needed to further understand how this  
5 partnership is created and perceived. The aim of this study is to explore the  
6 realities of partnership and participation as perceived by patients and health  
7 professionals in everyday PCC practice.  
8  
9

10  
11  
12 **Design:** Qualitative study employing a thematic analysis of semi-structured  
13 interviews with professionals and patients.  
14

15  
16 **Setting:** Four internal medicine wards and 2 primary care centres in western  
17 Sweden.  
18

19  
20  
21 **Participants:** 20 patients admitted to hospital wards delivering person-centred  
22 care and 16 health professionals based on these wards and primary care centres.  
23

24  
25 **Results:** Our findings identified both informal and formal aspects of partnership.  
26 Informal aspects, emerging during the interaction between healthcare  
27 professionals and patients, without any prior guidelines or regulations  
28 incorporated proximity and receptiveness of professionals, and building a close  
29 connection and confidence. This epitomised a caring, respectful relationship  
30 congruent across accounts. Formal aspects, including structured ways of  
31 sustaining partnership were experienced differently. Professionals described  
32 collaborating with patients to encourage participation, capture personal goals,  
33 plan and document care. However, although patients felt listened to and  
34 informed, they were content to ask questions and felt less involved in care  
35 planning, documentation or exploring lifeworld goals. They commonly perceived  
36 participation as informed discussion and agreement, deferring to professional  
37 knowledge and expertise in the presence of an empathetic and trusting  
38 relationship.  
39  
40  
41  
42  
43  
44  
45  
46  
47  
48

49 **Conclusions:**

50  
51  
52 In our study patients appear to value a process of human connectedness above  
53 and beyond formalised aspects of documenting agreed goals and care planning.  
54 PCC increases patients' confidence in professionals who are competent and able  
55 to make them feel safe and secure. Informal elements of partnership provide the  
56  
57  
58  
59  
60

1  
2  
3 conditions for communication and mutual co-operation upon which formal  
4 relations of partnership can be constructed.  
5

6  
7 Keywords:

8  
9 Person-Centred Care, Patient-Centred Care, Patient Participation, Healthcare  
10 service  
11

12  
13  
14 **Strengths and limitations of this study:**

- 15 • This study reports the experiences of both patients and professionals in  
16 hospital settings which have implemented an evidence based model of  
17 person centred care .  
18
- 19 • The study population consisted of professionals with a broad range of  
20 clinical experience and patients with diverse medical signs and  
21 symptoms.  
22
- 23 • Our sample was not designed to be statistically representative, nor can we  
24 claim to have reached data saturation.  
25  
26  
27  
28  
29  
30  
31  
32  
33  
34  
35  
36

37 **INTRODUCTION**

38  
39 Increasingly clinicians are encouraged to engage, inform and involve patients <sup>1 2</sup>  
40 and support health policies that promote patient led care through ‘activated’  
41 patients trained in self-management skills <sup>3 4</sup>. Health professionals and policy  
42 makers aspire towards person centred care (PCC) <sup>5-7</sup> and recent models of PCC  
43 prioritise a whole systems approach that places patients at the centre <sup>8-10</sup>. It is  
44 clear that with professional support, patients can become active partners in their  
45 care <sup>11-15</sup> and can benefit from opportunities to take part <sup>16 17 18</sup>. However,  
46 despite the development of PCC and the push towards patient professional  
47 partnerships <sup>8</sup>, there is much talk and little action <sup>7 19-21</sup>. Substantial  
48 organisational and cultural barriers exist <sup>20 22 23 24</sup> and in order to overcome these  
49 barriers, both patients and professionals need to feel engaged, respected and  
50 treated as equals <sup>2 11 12 25 14 26 27</sup>. To date, there are numerous care concepts such  
51  
52  
53  
54  
55  
56  
57  
58  
59  
60

1  
2  
3 as patient-centred care, individualized care and narrative medicine that touch  
4 upon patient involvement and partnership, all including some sort of reciprocity  
5 and shared knowledge <sup>28 29</sup>, self management <sup>30 31</sup> participation in decision  
6 making <sup>32</sup>. Different PCC frameworks lift patient involvement toward an  
7 enhanced therapeutic relationship that requires sharing power and  
8 responsibility <sup>6</sup>. Yet, as patients are increasingly offered more choice and  
9 involvement, researchers also describe circumstances where patients choose to  
10 decline participation, defer decisions or feel unable to participate <sup>33 34</sup>. It seems  
11 that the notion of the patient as an active partner in care requires empirical  
12 understanding and clarity.  
13  
14  
15  
16  
17  
18  
19

20  
21 Cribb and Entwistle (2011) draw attention to the importance of an emotionally  
22 supportive patient-professional partnership to aid 'meaningful participation' and  
23 shared decision-making <sup>14</sup>. Relationships that are open ended and conversational  
24 are prioritised as well as professional virtues and patient capabilities. This  
25 approach takes into account the relational aspects of partnership, which pay  
26 attention to the mindfulness of professionals and the unique aspects of patients'  
27 lives <sup>5 35 36</sup>. However, although power sharing implies an egalitarian and  
28 meaningful patient-professional relationship <sup>29</sup>, the literature describes a  
29 hierarchy of relationships depicting the different levels of engagement,  
30 responsibility and shared goals <sup>31 37</sup>. This moves from the lowest level i.e.  
31 involvement towards participation and the highest level i.e. partnership <sup>32 37</sup>.  
32 Thoransdottir & Kristjansson (2014) elaborate on informal and formal  
33 relationships; the former describing the fundamental importance of human  
34 connectedness and the latter involving shared agreements on decisions and  
35 documentation <sup>31</sup>. Thoransdottir & Kristjansson suggest that the ethics of care, meaning  
36 the informal aspects of human connectedness, is fundamental to the establishment of a  
37 partnership. However, it is important to acknowledge that both aspects are equally crucial for  
38 partnership.  
39  
40  
41  
42  
43  
44  
45  
46  
47  
48  
49  
50  
51  
52

53 In this paper we use a Swedish initiative for implementing an evidence-based  
54 PCC model as a case study. The University of Gothenburg Centre for PCC (GPCC)  
55 has introduced a new evidence based model<sup>38-41</sup>, supported by a programme of  
56 training and research, which has changed clinical practice.<sup>42</sup> This model consists  
57  
58  
59  
60

1  
2  
3 of three 'routines' of PCC namely narrative, partnership and documentation <sup>39 42</sup>  
4 <sup>43</sup>. Partnership in the GPCC framework is the main routine that drives the PCC  
5 process. The patient's narrative paves the way for collaboration, and  
6 documentation safeguards this collaboration. The aim of this study is to explore  
7 the realities of partnership as perceived by patients and health professionals in  
8 everyday PCC practice.  
9  
10  
11  
12

## 13 14 15 METHODS

### 16 17 **Sample and design**

18  
19 This study adopted an interpretive approach employing qualitative semi-  
20 structured interviews. We used a purposive sampling strategy to capture several  
21 professional categories and a convenience sampling approach for patients (table  
22 1). Four hospital wards at a large teaching hospital in west Sweden were chosen;  
23 these varied in size (18 to 36 hospital beds), specialization and patient group  
24 (patients with chronic and/or acute illness and from self-managing to bed-  
25 confined). Each ward took part in a 10 week PCC change management/training  
26 program, incorporating both lectures and workshops regarding the ethics of PCC,  
27 research findings from PCC studies as well as training in using different tools  
28 such as care plans and interview techniques. The ward manager chose members  
29 of staff (RN, AN, Physicians) as designated change agents in the training program  
30 and to implement PCC to their colleagues on each ward.  
31  
32  
33  
34  
35  
36  
37  
38  
39

#### 40 41 *Table 1 Description of practitioners and patient demography*

42  
43 Each ward manager was contacted with information about the study and gave  
44 their consent. They were then asked to recruit a nurse, an assistant nurse and a  
45 physician, with experience of working with PCC and from the training program,  
46 from their ward.  
47  
48  
49

50  
51 Patients were eligible for enrolment into the study if they were cognisant, able to  
52 communicate in Swedish and admitted to a reference ward where PCC was being  
53 implemented at the hospital. The patients were admitted for symptoms of  
54 chronic heart failure, chronic obstructive lung disease, infections, anemia,  
55  
56  
57  
58  
59  
60

1  
2  
3 colorectal diseases such as Ulcerative Colitis, Crohn's disease, colon surgery and  
4 hepatological disease.  
5

6  
7 This reference ward had implemented PCC systematically using a 10 week  
8 extensive training course facilitated by GPCC following the PCC routines <sup>38</sup>.  
9

10  
11 A nurse coordinator working on the ward provided eligible patients with the  
12 study information. Twenty-one patients volunteered to participate and gave  
13 their informed consent to be contacted by the study team after discharge and to  
14 be interviewed about the care they had received. One patient was excluded when  
15 transferred from another ward to the reference ward, which hampered recall.  
16  
17  
18  
19

### 20 **Data collection**

21  
22 The interview guide for practitioners included questions about how PCC related  
23 to the everyday work of healthcare practitioners and its implementation. The  
24 interview guide for patients intended to elicit patients' experiences of care on the  
25 ward and their understanding of PCC (table 2).  
26  
27  
28  
29  
30  
31  
32  
33

#### 34 *Table 2 Interview guide practitioners and patients*

35  
36  
37  
38 DL conducted 12 interviews with professionals, AW conducted 2, and a trained  
39 research assistant conducted 3 interviews with practitioners and all interviews  
40 with patients.  
41  
42  
43

44 All interviews were audio recorded, transcribed verbatim, anonymised and  
45 translated from Swedish into English. All interviewees were given a numbered  
46 pseudonym to maintain confidentiality (P for Patient, N for Nurses, M for  
47 Manager and MD for Physician). All participants were told that they were free to  
48 withdraw their consent at any time during the study. Patients were interviewed  
49 after their hospital stay, in a place of their choosing to ensure that they felt  
50 comfortable talking about the care episode. All interviews with patients were  
51 performed by researchers without a clinical background or connection to the  
52  
53  
54  
55  
56  
57  
58  
59  
60

1  
2  
3 hospital. The regional ethics committee in Gothenburg approved the study and  
4 all participants, prior to their interview, gave informed consent. If the patients  
5 wanted to talk to a healthcare professional regarding general or specific topics  
6 that came up during the interviews, they were able to talk to a nurse about their  
7 concern or thoughts.  
8  
9  
10

### 11 **Analysis**

12  
13 Interviews were thematically analysed, adopting some basic features of  
14 grounded theory. Interviews were analysed initially employing line-by-line  
15 coding and an inductive, intuitive reading of the transcripts. Transcripts were  
16 independently coded by LM, ON & DL, summarised and then discussed by online  
17 and face-to-face meetings. A combination of computer software (NVivo 9) and  
18 hand written methods were used and mind mapping to assist with the  
19 development of themes <sup>44</sup>. We then followed a deductive process to explore how  
20 the characteristics and components of partnership were experienced by  
21 professionals and patients. Early analysis identified categories associated with  
22 providing comfort, creating confidence and finding common ground through  
23 everyday informal interactions. In contrast, other categories revealed formalised  
24 care provided by professionals such as exchanging information, planning,  
25 evaluating and documenting care. However, when these were compared with  
26 patient transcripts patients described a simplified and practical process such as  
27 receiving some form of paperwork and knowing what was done. As analysis  
28 progressed we categorized these findings under two main themes: informal and  
29 formal aspects of partnership. These findings were discussed with the whole  
30 team in order to address differences and reach a consensus.  
31  
32  
33  
34  
35  
36  
37  
38  
39  
40  
41  
42  
43  
44  
45  
46  
47  
48

### 49 **Results**

50 Two main themes were found: firstly informal aspects of partnership comprising  
51 two subthemes, proximity & receptiveness and building a personal connection/  
52 confidence. Informal aspects of partnership were interpreted as those emerging  
53 during the interaction between healthcare professionals and patients. The  
54 second main theme was formal aspects of partnership having two subthemes,  
55  
56  
57  
58  
59  
60



1  
2  
3 aspects of goal setting and care planning, and documentation. Formal  
4 partnership is about the structured ways of sustaining the relationship between  
5 the health professionals and the patients via deciding goals, care planning and  
6 documentation. The results are presented below to allow comparison between  
7 the 2 groups.  
8  
9  
10

### 11 **Informal aspects of partnership**

#### 12 *Proximity and receptiveness*

13  
14  
15  
16  
17 Professionals described engaging patients in conversation with the intention of  
18 respecting and listening to the patient dialogue, understanding the patient's  
19 situation, making a good start and building a close connection. Assistant nurses  
20 followed this process each morning and described feeling 'closer' to the patient,  
21 seeing and hearing aspects of the patient from a social, psychological and  
22 physical perspective and becoming their 'eyes and ears'. Professionals described  
23 using communication techniques such as posing open, straightforward questions,  
24 talking without distractions and not judging. A number of professionals felt this  
25 process aided partnership in subsequent meetings.  
26  
27  
28  
29  
30  
31  
32

33 I think that I and the nurse get a great response from the patients, straight  
34 away, that they feel very comfortable in this. They know who to turn to.  
35 That they feel like they've been given a lot of time, even if it's not that long  
36 time, but the content of the consultation gives them that feeling. (MD1)  
37  
38  
39

40 Many patients described positive feelings towards the receptiveness of staff and  
41 the atmosphere of the ward. Accounts of unhurried and immediate support with  
42 care provided in a caring and close manner were common.  
43  
44  
45

46 Not everyone sits down at your bedside, just a few of them do. Mostly  
47 they pull out chair or something to sit on. They are not on their way to  
48 another patient when they do that. It's more of a good opening; that we  
49 are sitting here now, talking, until we are finished doing that. (P1)  
50  
51  
52  
53  
54  
55  
56  
57  
58  
59  
60

1  
2  
3 Available and reliable professionals increased patients' comfort, with  
4 professionals described as thoughtful, open and warm, leading to patients feeling  
5 a sense of humanity, security, familiarity and trust.  
6  
7

8  
9 They say "Hi Paula!" and then they present themselves with their name  
10 and then the title comes. Already there they create an opportunity for  
11 dialogue. It's not "I'm nurse, good day." So at that point it feels like an  
12 openness and they simply and easily describe how my life will be in this  
13 room. (P2)  
14  
15  
16  
17  
18  
19

### 20 *Building a close connection and confidence*

21  
22 Professionals described listening in a more engaged way to patients' wishes and  
23 needs. They emphasised the importance of knowing how patients felt, what they  
24 thought, aspects of their personality and personal knowledge, described by one  
25 professional as 'life-luggage'. Patients were prompted to discuss personal  
26 interests and common topics. For most professionals finding common ground  
27 built trust, security and a collaborative relationship on a person-to-person level.  
28  
29  
30  
31  
32

33 You may talk about books or music, or common interests so that you're  
34 not only... You establish a relationship beyond the nurse-patient, and it  
35 becomes more like person to person. (N1)  
36  
37  
38

39 In keeping with professionals' aspirations, many patients felt listened to and  
40 acknowledged. Several felt known personally, for who they were and their  
41 individual needs.  
42  
43  
44  
45

46 They could ask ordinary questions about the everyday life. We could talk  
47 about summer houses, and pets, and kind of on that level. And that's... I  
48 think that's very important. I think so at least... one is feeling more as if  
49 you aren't just a patient among others. (P3)  
50  
51  
52  
53  
54  
55  
56  
57  
58  
59  
60

1  
2  
3 Some patients reported that they noticed changes in professionals' receptiveness.  
4  
5

6 'I was thinking that I should ask him to sit down, but you know how it is, no.  
7 But I can think that it's a different situation. He stands there taller than me  
8 who's sitting on the bedside. I don't like that....But what I regret is that I  
9 wasn't able to look at my x-rays on CT-abdomen. I had asked for that  
10 previously, but I didn't receive an answer to that. Well, I might have said that  
11 I wanted to see my x-rays. It can be interesting to look with a physician,  
12 because I know nothing about... I can't do it myself. So I asked for that the  
13 last day, but she said that she was much stressed, the assistant physician, and  
14 she had had very much to do. I would have wanted that. I'm sure I will get  
15 them to my home. I have requested everything and my medical records, but I  
16 can't examine things like those. It wasn't anything, but it would have been  
17 interesting to look at it. Sit with a doctor and review it (P4)  
18  
19  
20  
21  
22  
23  
24  
25  
26

27 However other patients paid less attention to this change in professionals' receptiveness since  
28 they considered their hospitalisation as brief and requiring straightforward treatment.  
29  
30  
31

## 32 **Formal partnership**

### 33 *Goal setting and care planning*

34  
35 Professionals reported working in partnership with patients in formal ways by  
36 giving and exchanging information, updating, summarizing and care planning.  
37 For example, patients are encouraged to discuss aspects of their symptoms,  
38 treatment, diagnosis and discharge plans. A number of professionals described  
39 making a 'team decision', alternatively known as a health plan, in collaboration  
40 with patients. This acknowledged a person's capabilities and personal goals that  
41 were agreed, documented and given to the patient. This is in line with the PCC  
42 routine of safeguarding the partnership through agreed goals.  
43  
44  
45  
46  
47  
48  
49  
50

51  
52 The patient when at the hospital together with the nurse and the doctor  
53 decided what are the main issues: is it losing weight, is it anxiety, is it stop  
54 smoking or getting better medication or is it more training, physical  
55 activities, is it fear of training? And so on. So when they left the hospital  
56  
57  
58  
59  
60

1  
2  
3 they had this sheet where they had described their problem and it was  
4 just, it was their problem it was not a standard formula – the formula was  
5 standard but the questions and the wishes from the patient was personal  
6  
7  
8 (MD2)  
9

10 Informal aspects of partnership led to an environment where it became possible  
11 for patients to ask questions, learn about their condition and treatment.  
12 Professionals believed patients had the inclination to begin caring for themselves,  
13 follow suggestions and instructions. Formal aspects such as discussing goals  
14 facilitated self-care such as getting dressed, mobilising on the ward, preparing  
15 for discharge and following advice post discharge.  
16  
17  
18  
19

20  
21 Several professionals described the need to encourage, 'push' or 'pass' on  
22 competence to the patient, by letting the patient ask questions and take part in  
23 the care planning, hence enabling the patient to become well informed,  
24 knowledgeable and take responsibility.  
25  
26  
27  
28

29 There is a more practical understanding that the patient also carries a  
30 responsibility, and also is responsible for the process. I tend to think that  
31 my ward is at this stage of the process – to get the patient to understand  
32 the significance of his or her participation to activity, to rehabilitation.  
33  
34  
35  
36 (M1)  
37  
38

39 Professionals noticed a change, where patients who were well informed, knew  
40 they had an impact, influence and could handle themselves. They seemed  
41 satisfied and more willing to help themselves and 'buy the whole concept'.  
42  
43  
44

45 We look at what the patient usually does in their everyday life outside the  
46 hospital, and what the patient does right now, and what we can do to  
47 improve and to support that the patient becomes their ordinary self again.  
48 And that you really try to understand how they can use their own  
49 resources and train themselves. (N2)  
50  
51  
52  
53  
54

55  
56 However from the patient perspective some remembered taking part in  
57 developing a health plan but few mentioned goals and when discussed, these  
58  
59  
60

1  
2  
3 were invariably described in medicalised terms or framed around home  
4 circumstances for discharge. Personal information was elicited and described,  
5 but not necessarily orientated towards 'lifeworld' goals.  
6  
7

8  
9 I don't actually know if the goal has been mentioned, but that might be the  
10 goal with the illness I have, that the goal is to be free from relapses.  
11 Because everything would then be as good as they can be. One wouldn't  
12 suffer from the disease then. As long as one takes medicine that doesn't  
13 give side-effects and isn't suffering from relapses, then everything will be  
14 okay. And I know that has been mentioned, that it might be the goal after  
15 all. But that, as I said, that has to do with the disease. (P5)  
16  
17  
18  
19  
20

21 Patients felt they contributed when they discussed choices with professionals,  
22 helped themselves, used their initiative and became knowledgeable. There were  
23 opportunities to question, decline treatment and contribute to discharge  
24 planning. For some, participation involved discussing test results, investigations  
25 and medication management that helped them 'feel' (our emphasis) they were  
26 committed to taking part in their care, for example by discussing an ultrasound  
27 test, a transfusion or a colonoscopy procedure. They received explanations and  
28 felt they knew what to do, how to deal with medication and treatments.  
29  
30  
31  
32  
33  
34

35  
36 I know much more about my illness now and why it has become the way  
37 it has, I think I understand that better now. And that I can see in hindsight  
38 that I haven't been feeling well for a very long time, which has been  
39 connected to this. So now I have got a much clearer picture of my  
40 condition. (P6)  
41  
42  
43  
44  
45

46 Others felt they participated by listening to professionals, agreeing and accepting  
47 professionals' decision-making. They felt confident, comfortable and treated as  
48 equals, described by one patient as 'horizontal communication'. A few patients  
49 described themselves as 'experienced', 'verbal' even when very ill and able to  
50 'demand and ask questions'. Yet for patients in this study, participating was  
51 described in terms of informed discussion, acceptance and agreement,  
52 participating up to a point or as far as they felt able. Several felt comfortable  
53 'submitting' and 'not being in the driving seat'.  
54  
55  
56  
57  
58  
59  
60

1  
2  
3 Many times one might feel like one is participating... one sometimes may  
4 be silent, but still feel a fellowship. Do you understand what I mean? And  
5 that's probably what I felt with the ward. That I didn't need to ask or I  
6 didn't need to ask them, the nurses I mean, since I knew in some way that  
7 the community still was there. (P7)  
8  
9  
10

11  
12  
13 When I say no to something, they listen to me. Whatever it might be; the discharge or  
14 anything. Or some kind of examination... I said no to an examination, and I said that:  
15 "You did that examination just six months ago, and it's very painful. Is it really  
16 necessary to do it again?" "No, then we won't do it." (P1)  
17  
18  
19

20  
21 Since you are part of the treatments, and you know how they are doing the plan for  
22 the treatment and are explaining in a good way. So even when you return home, you  
23 know approximately about... Well, now I know how I will deal with the medications  
24 and the treatment and everything, in a completely different way. (P7)  
25  
26  
27

## 28 Documentation

29  
30 Professionals described writing care plans with patients, eliciting biomedical  
31 information and discussing social and discharge planning. Decisions and plans  
32 were agreed and documented.  
33  
34  
35

36 You should make a plan together with the patient and that you discuss  
37 with the patient and so on, but the difference of having it in this way is  
38 that you have more of a structure of it. You create a framework for what it  
39 means to work like this, so that what you're doing becomes more  
40 concrete. (MD3)  
41  
42  
43  
44

45 In some way the patient gets what we've done on paper, and we get a  
46 proof of that we understand it in the right way, so that the patient can say  
47 "Yes, this is how it was" or "I don't agree with this." The important thing is  
48 that you agree, so that you are on the same page so to speak. (N1)  
49  
50  
51  
52

53 In this respect professionals described 'a new practice' where patients were  
54 encouraged to actively participate, become more involved and take part in  
55 decisions about their care.  
56  
57  
58  
59  
60

1  
2  
3 Documentation acted as a reminder for patients to discuss care on 'a new  
4 level'. (N3)  
5  
6

7 You must create a care plan with the patient within 48 hours and then  
8 you should write why they have sought care and what we have planned  
9 for them and this should be addressed at the round with the patient, and  
10 it is written down and then it's a little investigation to see what the  
11 patients can do themselves. (N4)  
12  
13  
14  
15

16 Professionals encouraged patients to use their own resources and expertise. For  
17 example patients were encouraged to prepare for conversations with the team  
18 and write down thoughts or questions.  
19  
20  
21

22 Patients felt informed about their condition, discharge and future care needs, felt  
23 they were listened to and some felt they were participating in their care plan.  
24  
25

26 I think, that it felt like it was a team. Decisions where I participated in, and  
27 the care plan and such things. How much you actually were that, I don't  
28 know, but at least you had a picture of it, so. But I can't decide how I'm  
29 going to be treated or taken care of, but at least you can be a part of it and  
30 have opinions, you were able to do that. (P8)  
31  
32  
33  
34  
35

36 Although patients remembered receiving written information and some  
37 described opportunities to write down thoughts, questions and contribute to  
38 their care, they did not remember the written information in any detail.  
39 Nevertheless, patients saw this documentation in 'simple' terms whereby they  
40 felt taken care of and in receipt of sufficient information.  
41  
42  
43  
44

#### 45 Discussion

46  
47 In our study, interviewees' accounts reflect levels of mutuality, self-expression  
48 and respect that lay the groundwork for PCC and indicate a move from disease  
49 focused models of care<sup>19</sup>. In keeping with the literature we suggest that informal  
50 elements of partnership provide the conditions for communication and mutual  
51 co-operation upon which formal relations of partnership can be constructed<sup>27 31</sup>  
52  
53  
54  
55  
56  
57  
58  
59  
60  
61  
62  
63  
64  
65  
66  
67  
68  
69  
70  
71  
72  
73  
74  
75  
76  
77  
78  
79  
80  
81  
82  
83  
84  
85  
86  
87  
88  
89  
90  
91  
92  
93  
94  
95  
96  
97  
98  
99  
100  
101  
102  
103  
104  
105  
106  
107  
108  
109  
110  
111  
112  
113  
114  
115  
116  
117  
118  
119  
120  
121  
122  
123  
124  
125  
126  
127  
128  
129  
130  
131  
132  
133  
134  
135  
136  
137  
138  
139  
140  
141  
142  
143  
144  
145  
146  
147  
148  
149  
150  
151  
152  
153  
154  
155  
156  
157  
158  
159  
160  
161  
162  
163  
164  
165  
166  
167  
168  
169  
170  
171  
172  
173  
174  
175  
176  
177  
178  
179  
180  
181  
182  
183  
184  
185  
186  
187  
188  
189  
190  
191  
192  
193  
194  
195  
196  
197  
198  
199  
200  
201  
202  
203  
204  
205  
206  
207  
208  
209  
210  
211  
212  
213  
214  
215  
216  
217  
218  
219  
220  
221  
222  
223  
224  
225  
226  
227  
228  
229  
230  
231  
232  
233  
234  
235  
236  
237  
238  
239  
240  
241  
242  
243  
244  
245  
246  
247  
248  
249  
250  
251  
252  
253  
254  
255  
256  
257  
258  
259  
260  
261  
262  
263  
264  
265  
266  
267  
268  
269  
270  
271  
272  
273  
274  
275  
276  
277  
278  
279  
280  
281  
282  
283  
284  
285  
286  
287  
288  
289  
290  
291  
292  
293  
294  
295  
296  
297  
298  
299  
300  
301  
302  
303  
304  
305  
306  
307  
308  
309  
310  
311  
312  
313  
314  
315  
316  
317  
318  
319  
320  
321  
322  
323  
324  
325  
326  
327  
328  
329  
330  
331  
332  
333  
334  
335  
336  
337  
338  
339  
340  
341  
342  
343  
344  
345  
346  
347  
348  
349  
350  
351  
352  
353  
354  
355  
356  
357  
358  
359  
360  
361  
362  
363  
364  
365  
366  
367  
368  
369  
370  
371  
372  
373  
374  
375  
376  
377  
378  
379  
380  
381  
382  
383  
384  
385  
386  
387  
388  
389  
390  
391  
392  
393  
394  
395  
396  
397  
398  
399  
400  
401  
402  
403  
404  
405  
406  
407  
408  
409  
410  
411  
412  
413  
414  
415  
416  
417  
418  
419  
420  
421  
422  
423  
424  
425  
426  
427  
428  
429  
430  
431  
432  
433  
434  
435  
436  
437  
438  
439  
440  
441  
442  
443  
444  
445  
446  
447  
448  
449  
450  
451  
452  
453  
454  
455  
456  
457  
458  
459  
460  
461  
462  
463  
464  
465  
466  
467  
468  
469  
470  
471  
472  
473  
474  
475  
476  
477  
478  
479  
480  
481  
482  
483  
484  
485  
486  
487  
488  
489  
490  
491  
492  
493  
494  
495  
496  
497  
498  
499  
500  
501  
502  
503  
504  
505  
506  
507  
508  
509  
510  
511  
512  
513  
514  
515  
516  
517  
518  
519  
520  
521  
522  
523  
524  
525  
526  
527  
528  
529  
530  
531  
532  
533  
534  
535  
536  
537  
538  
539  
540  
541  
542  
543  
544  
545  
546  
547  
548  
549  
550  
551  
552  
553  
554  
555  
556  
557  
558  
559  
560  
561  
562  
563  
564  
565  
566  
567  
568  
569  
570  
571  
572  
573  
574  
575  
576  
577  
578  
579  
580  
581  
582  
583  
584  
585  
586  
587  
588  
589  
590  
591  
592  
593  
594  
595  
596  
597  
598  
599  
600  
601  
602  
603  
604  
605  
606  
607  
608  
609  
610  
611  
612  
613  
614  
615  
616  
617  
618  
619  
620  
621  
622  
623  
624  
625  
626  
627  
628  
629  
630  
631  
632  
633  
634  
635  
636  
637  
638  
639  
640  
641  
642  
643  
644  
645  
646  
647  
648  
649  
650  
651  
652  
653  
654  
655  
656  
657  
658  
659  
660  
661  
662  
663  
664  
665  
666  
667  
668  
669  
670  
671  
672  
673  
674  
675  
676  
677  
678  
679  
680  
681  
682  
683  
684  
685  
686  
687  
688  
689  
690  
691  
692  
693  
694  
695  
696  
697  
698  
699  
700  
701  
702  
703  
704  
705  
706  
707  
708  
709  
710  
711  
712  
713  
714  
715  
716  
717  
718  
719  
720  
721  
722  
723  
724  
725  
726  
727  
728  
729  
730  
731  
732  
733  
734  
735  
736  
737  
738  
739  
740  
741  
742  
743  
744  
745  
746  
747  
748  
749  
750  
751  
752  
753  
754  
755  
756  
757  
758  
759  
760  
761  
762  
763  
764  
765  
766  
767  
768  
769  
770  
771  
772  
773  
774  
775  
776  
777  
778  
779  
780  
781  
782  
783  
784  
785  
786  
787  
788  
789  
790  
791  
792  
793  
794  
795  
796  
797  
798  
799  
800  
801  
802  
803  
804  
805  
806  
807  
808  
809  
810  
811  
812  
813  
814  
815  
816  
817  
818  
819  
820  
821  
822  
823  
824  
825  
826  
827  
828  
829  
830  
831  
832  
833  
834  
835  
836  
837  
838  
839  
840  
841  
842  
843  
844  
845  
846  
847  
848  
849  
850  
851  
852  
853  
854  
855  
856  
857  
858  
859  
860  
861  
862  
863  
864  
865  
866  
867  
868  
869  
870  
871  
872  
873  
874  
875  
876  
877  
878  
879  
880  
881  
882  
883  
884  
885  
886  
887  
888  
889  
890  
891  
892  
893  
894  
895  
896  
897  
898  
899  
900  
901  
902  
903  
904  
905  
906  
907  
908  
909  
910  
911  
912  
913  
914  
915  
916  
917  
918  
919  
920  
921  
922  
923  
924  
925  
926  
927  
928  
929  
930  
931  
932  
933  
934  
935  
936  
937  
938  
939  
940  
941  
942  
943  
944  
945  
946  
947  
948  
949  
950  
951  
952  
953  
954  
955  
956  
957  
958  
959  
960  
961  
962  
963  
964  
965  
966  
967  
968  
969  
970  
971  
972  
973  
974  
975  
976  
977  
978  
979  
980  
981  
982  
983  
984  
985  
986  
987  
988  
989  
990  
991  
992  
993  
994  
995  
996  
997  
998  
999  
1000

1  
2  
3 making which is possible to aspire to and practically achieve <sup>14</sup>. Informal  
4 elements in our study depict emotionally supportive relationships that pave the  
5 way for patients to participate, once the scene is set and the circumstances feel  
6 right.  
7  
8  
9

10  
11 However, in our findings patients were content to be able to ask questions and  
12 receive information. They perceived participation as informed discussion and  
13 agreement, deferring to professional knowledge and expertise and not  
14 necessarily describing opportunities for empowerment and activation. Perceived  
15 competence of professionals seemed enough for patients and whilst patients  
16 prioritised the informal processes where 'good care' may have been interpreted  
17 as PCC, professionals prioritised outcomes that were formal and documented.  
18 Patients described participating in plans for discharge but did not describe  
19 notions of enablement or control. As with other studies, patients were satisfied  
20 with a personal approach and a positive partnership with professionals who  
21 communicated empathetically and effectively <sup>45</sup> with professionals acting as  
22 educators, building mutual and collaborative partnerships <sup>46</sup>. Measurements of  
23 optimum patient-professional relationships and person-centredness need to  
24 consider patients' emotional and personal responses that highlight the process  
25 rather than the outcome of interactions with health professionals <sup>5 14 27 35</sup>.  
26 Aspects of informal and formal partnership appeared to act as antecedents of  
27 patient participation. Yet overall, most patients portrayed a taken-for-granted  
28 pragmatism, trusting professionals with expertise and competence to make  
29 overall decisions in a caring environment. For patients in this study, PCC was not  
30 explicitly understood or described as an opportunity to formalize a partnership  
31 with professionals in order to actively participate in their care. There were more  
32 formal aspects of partnership that took precedence in patients' minds, which is  
33 in line with the description of the fundamentals of human connectedness  
34 described by Thoransdottir & Kristjansson (2014), pointing toward the ethical  
35 dimension of partnership and PCC. In addition, professionals may have  
36 considered PCC as a particular professional approach rather than a systematic  
37 endeavour to "invite" patients to participate in the PCC routines and explicate  
38 the model.  
39  
40  
41  
42  
43  
44  
45  
46  
47  
48  
49  
50  
51  
52  
53  
54  
55  
56  
57  
58  
59  
60



1  
2  
3 Aspects of partnership, particularly informal aspects, led patients to leave some  
4 decisions to the professionals since they felt cared for and well informed.  
5  
6 Patients were not forced to make a choice, but they were rather given guidance  
7 and information. In this respect patients' interpretation of participation can be  
8 viewed, not as passive submission or deferment to professional expertise and  
9 knowledge, but a common understanding reached through a therapeutic  
10 relationship. Our interpretation of the present study points toward the  
11 importance of human connectedness and the feeling of being listen to and  
12 acknowledged as a person (informal aspect) for patients, while routines and  
13 formal aspects of care came more into the foreground for the practitioners. It  
14 seems as if in order to integrate the patient into clinical practice, there seems to  
15 be a balancing act that practitioners as well as patients need to reflect upon:  
16 recognition of the patient as a person (informal aspects) needs to balance the  
17 specific practical routines (formal aspects)<sup>42</sup>. The risk could otherwise be that  
18 the patient as a person becomes a "checkbox" in a routine, which in many aspects  
19 would entrench profession-centred care rather than person-centredness.  
20  
21  
22  
23  
24  
25  
26  
27  
28  
29  
30  
31  
32

33 This study has some limitations. Patients did not necessarily perceive their care  
34 in the context of a PCC model and our study depended upon patients  
35 remembering events and perhaps perceiving the relevance of information and  
36 care strategies. Secondly, because the study took place in a particular  
37 institutional context (GPCC) in Sweden, the findings may not be transferable to  
38 other settings. Moreover, formal aspects of partnership, for example,  
39 documented care plans and decisions, could have provided patients with  
40 opportunities to revisit decisions in written form, and maintain a sense of  
41 confidence and trust during their admission that was taken for granted.  
42 Moreover, most interviewees were older perhaps predisposing them to comply  
43 with professional expertise or feel knowledgeable but not necessarily  
44 empowered<sup>47</sup>. However, Ekdal et al (2011) suggest that older peoples'  
45 preferences for information and decision making are not associated with age,  
46 and that the majority of patients wanted more information, not less<sup>48</sup>.  
47  
48  
49  
50  
51  
52  
53  
54  
55  
56  
57  
58  
59  
60

1  
2  
3 Another limitation in this study is that patients were first contacted by a nurse  
4 coordinator and after agreeing to be part of the study, participants were  
5 contacted by the researchers after their discharge within the first 7 days to  
6 schedule a interview. Patients who agreed to participate in the interview study  
7 might have been more attentive to the particular aspects of PCC and eager to talk  
8 about their experience. This might have led to the tendency for positive accounts  
9 about the informal parts of partnership. However, it is equally important for the  
10 objective of the study to capture positive comments about partnership.  
11  
12  
13  
14  
15  
16

### 17 Conclusion

18 In our study patients appear to value a process of human connectedness above  
19 and beyond formal aspects of taking part and feeling activated and capable.  
20 These findings may point to the need for professionals to acknowledge the  
21 importance of the human connectedness that is as crucial as formal aspects for  
22 PCC to be fully realised in practice.  
23  
24  
25  
26  
27

### 28 Author contributions

29 LM and AW contributed equally to the study as first authors. All authors  
30 contributed to the study design, conception and development. DL and AW  
31 conducted the interviews together with research assistant Marie Hammer. LM,  
32 DL and ÖN initially analysed the data, and all authors met face to face and over  
33 skype as a group to discuss, revise and confirm the findings. All authors were  
34 responsible for critical revision and finalising the manuscript.  
35  
36  
37  
38  
39  
40  
41

### 42 Competing interest

43 Nicky Britten is a member of the Scientific Advisory Board of GPCC. The  
44 author(s) declared no potential conflicts of interest with respect to the research,  
45 authorship, and/or publication of this article.  
46  
47  
48

### 49 Funding

50 The study was funded by the Centre for Person-Centred Care (GPCC) and  
51 LETStudio at the University of Gothenburg, Sweden. Nicky Britten was partially  
52 supported by the National Institute for Health Research (NIHR) Collaboration for  
53 Leadership in Applied Health Research and Care South West Peninsula. The  
54 views expressed are those of the authors and not necessarily those of the NHS,  
55  
56  
57  
58  
59  
60

1  
2  
3 the NIHR or the Department of Health. The authors are grateful to the  
4 interviewees for their willingness to participate in the study.  
5  
6

7 Data sharing statement

8  
9 No additional unpublished data is available  
10  
11

12  
13  
14 Wordcount 4756  
15

16  
17 References  
18

- 19 1. Elwyn G, Frosch D, Thomson R, et al. Shared decision making: a model for  
20 clinical practice. *J Gen Intern Med* 2012;27(10):1361-7. doi:  
21 10.1007/s11606-012-2077-6 [published Online First: 2012/05/24]  
22
- 23 2. Elwyn G, Lloyd A, May C, et al. Collaborative deliberation: a model for patient  
24 care. *Patient Educ Couns* 2014;97(2):158-64. doi:  
25 10.1016/j.pec.2014.07.027 [published Online First: 2014/09/02]  
26
- 27 3. Department of Health. Long term conditions compendium of information,  
28 2012.
- 29 4. Eaton S, Roberts S, Turner B. Delivering person centred care in long term  
30 conditions. *Bmj* 2015;350:h181. doi: 10.1136/bmj.h181 [published  
31 Online First: 2015/02/12]
- 32 5. Epstein RM, Street RL, Jr. The values and value of patient-centered care. *Ann*  
33 *Fam Med* 2011;9(2):100-3. doi: 10.1370/afm.1239 [published Online  
34 First: 2011/03/16]
- 35 6. Harding E, Wait S, Scrutton J. The state of play in person-centred care:  
36 pragmatic review of how person-centred care is defined, applied and  
37 measured, featuring selected key contributors and case studies across the  
38 field.: The Health Foundation, 2015:1-140.
- 39 7. Hawkes N. Seeing things from the patients' view: what will it take? *Bmj*  
40 2015;350:g7757. doi: 10.1136/bmj.g7757 [published Online First:  
41 2015/02/12]
- 42 8. Health Foundation. Helping people help themselves, 2011.
- 43 9. King's Fund. People in control of their own health and care, 2014.
- 44 10. NHS England. Enhancing the quality of life for people living with long term  
45 conditions-the house of care, 2014.
- 46 11. Coulter A. Patient engagement--what works? *J Ambul Care Manage*  
47 2012;35(2):80-9. doi: 10.1097/JAC.0b013e318249e0fd [published Online  
48 First: 2012/03/15]
- 49 12. Coulter A, Collins A. Making shared decision-making a reality; no decision  
50 about me, without me. London: The King's Fund, 2011:1-40.
- 51 13. Coulter A, Safran D, Wasson JH. On the language and content of patient  
52 engagement. *J Ambul Care Manage* 2012;35(2):78-9. doi:  
53 10.1097/JAC.0b013e31824a5676 [published Online First: 2012/03/15]  
54  
55  
56  
57  
58  
59  
60

14. Cribb A, Entwistle VA. Shared decision making: trade-offs between narrower and broader conceptions. *Health Expect* 2011;14(2):210-9. doi: 10.1111/j.1369-7625.2011.00694.x
15. Makoul G, Clayman ML. An integrative model of shared decision making in medical encounters. *Patient Educ Couns* 2006;60(3):301-12. doi: 10.1016/j.pec.2005.06.010
16. Amin F. Commentary: Becoming a person centred practice. *Bmj* 2015;350:h269. doi: 10.1136/bmj.h269 [published Online First: 2015/02/12]
17. National Voices. Principles of care and support planning, 2013.
18. Coulter A, Entwistle VA, Eccles A, et al. Personalised care planning for adults with chronic or long-term health conditions. *Cochrane Database Syst Rev* 2015;3:CD010523. doi: 10.1002/14651858.CD010523.pub2 [published Online First: 2015/03/04]
19. Ekman I, Swedberg K, Taft C, et al. Person-centered care--ready for prime time. *Eur J Cardiovasc Nurs* 2011;10(4):248-51. doi: 10.1016/j.ejcnurse.2011.06.008 [published Online First: 2011/07/19]
20. Frosch DL. The patient is the most important member of the team. *Bmj* 2015;350:g7767. doi: 10.1136/bmj.g7767 [published Online First: 2015/02/12]
21. Frosch DL, May SG, Rendle KA, et al. Authoritarian physicians and patients' fear of being labeled 'difficult' among key obstacles to shared decision making. *Health Aff (Millwood)* 2012;31(5):1030-8. doi: 10.1377/hlthaff.2011.0576 [published Online First: 2012/05/09]
22. Moore L, Britten N, Lydahl D, et al. Barriers and facilitators to the implementation of person-centred care in different healthcare contexts. *Scand J Caring Sci* 2016 doi: 10.1111/scs.12376
23. Naldemirci O, Lydahl D, Britten N, et al. Tenacious assumptions of person-centred care? Exploring tensions and variations in practice. *Health (London)* 2016 doi: 10.1177/1363459316677627
24. Alharbi TS, Ekman I, Olsson LE, et al. Organizational culture and the implementation of person centered care: results from a change process in Swedish hospital care. *Health Policy* 2012;108(2-3):294-301. doi: 10.1016/j.healthpol.2012.09.003
25. Gravel K, Legare F, Graham ID. Barriers and facilitators to implementing shared decision-making in clinical practice: a systematic review of health professionals' perceptions. *Implement Sci* 2006;1:16. doi: 10.1186/1748-5908-1-16 [published Online First: 2006/08/11]
26. Entwistle VA. Considerations of 'fit' and patient involvement in decision making. *Health Expect* 2006;9(2):95-7. doi: 10.1111/j.1369-7625.2006.00397.x
27. Entwistle VA, Watt IS. Patient involvement in treatment decision-making: the case for a broader conceptual framework. *Patient Educ Couns* 2006;63(3):268-78. doi: 10.1016/j.pec.2006.05.002
28. Hudon C, Fortin M, Haggerty J, et al. Patient-centered care in chronic disease management: a thematic analysis of the literature in family medicine. *Patient Educ Couns* 2012;88(2):170-6. doi: 10.1016/j.pec.2012.01.009
29. Mead N, Bower P. Patient-centredness: a conceptual framework and review of the empirical literature. *Soc Sci Med* 2000;51(7):1087-110.

- 1
- 2
- 3 30. Sahlsten MJ, Larsson IE, Sjoström B, et al. An analysis of the concept of patient
- 4 participation. *Nurs Forum* 2008;43(1):2-11. doi: 10.1111/j.1744-
- 5 6198.2008.00090.x
- 6
- 7 31. Thorarinsdóttir K, Kristjánsson K. Patients' perspectives on person-centred
- 8 participation in health care: A framework analysis. *Nursing ethics* 2013
- 9 doi: 10.1177/0969733013490593
- 10
- 11 32. Frank C, Asp M, Dahlberg K. Patient participation in emergency care - a
- 12 phenomenographic analysis of caregivers' conceptions. *J Clin Nurs*
- 13 2009;18(18):2555-62. doi: 10.1111/j.1365-2702.2008.02477.x
- 14
- 15 33. Eldh AC, Ehnfors M, Ekman I. The phenomena of participation and non-
- 16 participation in health care--experiences of patients attending a nurse-led
- 17 clinic for chronic heart failure. *Eur J Cardiovasc Nurs* 2004;3(3):239-46.
- 18 doi: 10.1016/j.ejcnurse.2004.05.001
- 19
- 20 34. Eldh AC, Ekman I, Ehnfors M. Conditions for patient participation and non-
- 21 participation in health care. *Nursing ethics* 2006;13(5):503-14.
- 22
- 23 35. Epstein RM. Making communication research matter: what do patients
- 24 notice, what do patients want, and what do patients need? *Patient Educ*
- 25 *Couns* 2006;60(3):272-8. doi: 10.1016/j.pec.2005.11.003
- 26
- 27 36. Epstein RM, Franks P, Fiscella K, et al. Measuring patient-centered
- 28 communication in patient-physician consultations: theoretical and
- 29 practical issues. *Soc Sci Med* 2005;61(7):1516-28. doi:
- 30 10.1016/j.socscimed.2005.02.001
- 31
- 32 37. Cahill J. Patient participation: a concept analysis. *J Adv Nurs* 1996;24(3):561-
- 33 71.
- 34
- 35 38. Ekman I, Wolf A, Olsson LE, et al. Effects of person-centred care in patients
- 36 with chronic heart failure: the PCC-HF study. *Eur Heart J*
- 37 2012;33(9):1112-9. doi: 10.1093/eurheartj/ehr306 [published Online
- 38 First: 2011/09/20]
- 39
- 40 39. Fors A, Ekman I, Taft C, et al. Person-centred care after acute coronary
- 41 syndrome, from hospital to primary care - A randomised controlled trial.
- 42 *Int J Cardiol* 2015;187:693-9. doi: 10.1016/j.ijcard.2015.03.336
- 43 [published Online First: 2015/04/29]
- 44
- 45 40. Feldthusen C, Dean E, Forsblad-d'Elia H, et al. Effects of person-centered
- 46 physical therapy on fatigue-related variables in persons with rheumatoid
- 47 arthritis: a randomized controlled trial. *Arch Phys Med Rehabil*
- 48 2016;97(1):26-36.
- 49
- 50 41. Olsson LE, Hansson E, Ekman I. Evaluation of person-centred care after hip
- 51 replacement-a controlled before and after study on the effects of fear of
- 52 movement and self-efficacy compared to standard care. *BMC nursing*
- 53 2016;15(1):53. doi: 10.1186/s12912-016-0173-3
- 54
- 55 42. Britten N, Moore L, Lydahl D, et al. Elaboration of the Gothenburg model of
- 56 person-centred care. *Health Expect* 2016 doi: 10.1111/hex.12468
- 57 [published Online First: 2016/05/20]
- 58
- 59 43. Ekman I, Hedman H, Swedberg K, et al. Commentary: Swedish initiative on
- 60 person centred care. *Bmj* 2015;350:h160. doi: 10.1136/bmj.h160
- [published Online First: 2015/02/12]
44. Miles MB, Huberman AM, Saldana J. Qualitative data analysis: A methods
- sourcebook. Third ed. London: Sage Publications 2014.

- 1  
2  
3 45. Little P, Everitt H, Williamson I, et al. Observational study of effect of patient  
4 centredness and positive approach on outcomes of general practice  
5 consultations. *BMJ* 2001;323(7318):908-11. [published Online First:  
6 2001/10/23]  
7  
8 46. Roter D. The enduring and evolving nature of the patient-physician  
9 relationship. *Patient Educ Couns* 2000;39(1):5-15.  
10  
11 47. Joseph-Williams N, Elwyn G, Edwards A. Knowledge is not power for  
12 patients: a systematic review and thematic synthesis of patient-reported  
13 barriers and facilitators to shared decision making. *Patient Educ Couns*  
14 2014;94(3):291-309. doi: 10.1016/j.pec.2013.10.031 [published Online  
15 First: 2013/12/07]  
16  
17 48. Ekdahl AW, Andersson L, Wirehn AB, et al. Are elderly people with co-  
18 morbidities involved adequately in medical decision making when  
19 hospitalised? A cross-sectional survey. *BMC geriatrics* 2011;11:46. doi:  
20 10.1186/1471-2318-11-46 [published Online First: 2011/08/20]  
21  
22  
23  
24  
25  
26  
27  
28  
29  
30  
31  
32  
33  
34  
35  
36  
37  
38  
39  
40  
41  
42  
43  
44  
45  
46  
47  
48  
49  
50  
51  
52  
53  
54  
55  
56  
57  
58  
59  
60

**Table 1**

| Practitioners (n=17) |                 |
|----------------------|-----------------|
| Women (n)            | 14              |
| Profession           |                 |
| Registered nurse     | 5               |
| Assistant nurse      | 4               |
| Manager              | 4               |
| Physician            | 4               |
| Interview range      | 29-60 minutes   |
| Place for interview  |                 |
| Hospital             | 13              |
| Primary care center  | 2               |
| University           | 2               |
| Patient (n=20)       |                 |
| Women (n)            | 11              |
| Age median (range)   | 69, 35-88 years |
| Interview range      | 19-83 minutes   |
| Place for interview  |                 |
| Home                 | 13              |
| Hospital             | 2               |
| University           | 1               |
| Telephone            | 4               |

**Table 2**

| Interview guide: Practitioners | Interview guide: Patients |
|--------------------------------|---------------------------|
|--------------------------------|---------------------------|

|                                                                                                                                                                                                                                                                                                                                                                                                                                                                                                                                                                                                                                                                                                                                                                                                                                                                                                                                                                                                                                                                                                                                                                                                                                                                                                                                                                                                                                                                                                                                                                                                                                                                                                                                                                                                                                                                                                                                                                                                                                                                                                                                                                                                                                                                                                                                                                                                     |                                                                                                                                                                                                                                                                                                                                                                                                                                                                                                                                                                                                                                                                                                                                                                                                                                                                                                                                                                                                                                                                                                                                                                                                                                                                                                                                                                                                                                                                                                                                                                                                                                                                                                                                                                                                                                                                                                                                                                                                                                                                                                                                                                                                                                                                                                                          |
|-----------------------------------------------------------------------------------------------------------------------------------------------------------------------------------------------------------------------------------------------------------------------------------------------------------------------------------------------------------------------------------------------------------------------------------------------------------------------------------------------------------------------------------------------------------------------------------------------------------------------------------------------------------------------------------------------------------------------------------------------------------------------------------------------------------------------------------------------------------------------------------------------------------------------------------------------------------------------------------------------------------------------------------------------------------------------------------------------------------------------------------------------------------------------------------------------------------------------------------------------------------------------------------------------------------------------------------------------------------------------------------------------------------------------------------------------------------------------------------------------------------------------------------------------------------------------------------------------------------------------------------------------------------------------------------------------------------------------------------------------------------------------------------------------------------------------------------------------------------------------------------------------------------------------------------------------------------------------------------------------------------------------------------------------------------------------------------------------------------------------------------------------------------------------------------------------------------------------------------------------------------------------------------------------------------------------------------------------------------------------------------------------------|--------------------------------------------------------------------------------------------------------------------------------------------------------------------------------------------------------------------------------------------------------------------------------------------------------------------------------------------------------------------------------------------------------------------------------------------------------------------------------------------------------------------------------------------------------------------------------------------------------------------------------------------------------------------------------------------------------------------------------------------------------------------------------------------------------------------------------------------------------------------------------------------------------------------------------------------------------------------------------------------------------------------------------------------------------------------------------------------------------------------------------------------------------------------------------------------------------------------------------------------------------------------------------------------------------------------------------------------------------------------------------------------------------------------------------------------------------------------------------------------------------------------------------------------------------------------------------------------------------------------------------------------------------------------------------------------------------------------------------------------------------------------------------------------------------------------------------------------------------------------------------------------------------------------------------------------------------------------------------------------------------------------------------------------------------------------------------------------------------------------------------------------------------------------------------------------------------------------------------------------------------------------------------------------------------------------------|
| <p>1</p> <p>2</p> <p>3</p> <p>4</p> <p>5</p> <p>6</p> <p>7</p> <p>8</p> <p>9</p> <p>10</p> <p>11</p> <p>12</p> <p>13</p> <p>14</p> <p>15</p> <p>16</p> <p>17</p> <p>18</p> <p>19</p> <p>20</p> <p>21</p> <p>22</p> <p>23</p> <p>24</p> <p>25</p> <p>26</p> <p>27</p> <p>28</p> <p>29</p> <p>30</p> <p>31</p> <p>32</p> <p>33</p> <p>34</p> <p>35</p> <p>36</p> <p>37</p> <p>38</p> <p>39</p> <p>40</p> <p>41</p> <p>42</p> <p>43</p> <p>44</p> <p>45</p> <p>46</p> <p>47</p> <p>48</p> <p>49</p> <p>50</p> <p>51</p> <p>52</p> <p>53</p> <p>54</p> <p>55</p> <p>56</p> <p>57</p> <p>58</p> <p>59</p> <p>60</p> <ul style="list-style-type: none"> <li>To start with, could you tell me a bit about this ward/clinic/centre?</li> </ul> <p><b>Prompts:</b> Size? Practical work? Team?</p> <ul style="list-style-type: none"> <li>How did you start working with PCC?</li> </ul> <p><b>Prompts:</b> First contact with PCC? When did you first hear about it? Where did the idea come from? Did you have a special training?</p> <ul style="list-style-type: none"> <li>How did you implement PCC in the ward/clinic/centre? What did the implementation look like?</li> <li>Could you tell me about a regular day at work with PCC?</li> <li>Tell me about your practice and experiences with PCC on this ward/clinic/centre?</li> <li>How would you describe PCC to someone who is coming to work with you on your ward/center?</li> </ul> <p><b>Prompts:</b> How would you describe or define PCC?</p> <ul style="list-style-type: none"> <li>How did patients react to PCC?</li> <li>Would you tell me about any changes to your practice since you started working with PCC?</li> </ul> <p><b>Prompts:</b> Were there any changes in your ways of working? Relations with patients? Routines? Division of labour? Any changes-adaptions?</p> <ul style="list-style-type: none"> <li>What kind of documentation do you use when you work with PCC? Do you use any tools, diaries, notebooks, written material as part of PCC during your day? Can you describe this for me? How do you use this documentation for PCC in your work?</li> <li>What kinds of conditions do you think are required for PCC?</li> <li>What kinds of things do you think helped PCC and what kinds of things made PCC difficult in your experience?</li> <li>Is there anything else you would like to add?</li> </ul> | <ul style="list-style-type: none"> <li>Could you tell me about your experience of the care you received? How would you describe the care and treatment?</li> </ul> <p><b>Prompts:</b> Can you give examples of the kind of care you received? What did the routines look like?</p> <ul style="list-style-type: none"> <li>How have you experienced the relationship between you and the staff? How did you experience the communication between you and the staff?</li> </ul> <p><b>Prompts:</b> In which ways, did you receive information? Did you discuss your care and treatment with the staff? Did the staff listen to your concerns and questions?</p> <ul style="list-style-type: none"> <li>What has been important to you in the care that you got?</li> </ul> <p><b>Prompts:</b> How did you participate in decisions, have you been seen and listened to, information and communication about your care and treatment? Do you think that your resources/knowledge have been utilized?</p> <ul style="list-style-type: none"> <li>Do you think that the care you received was different from the care you have experience in the past and (if applicable) the care that you received later?</li> </ul> <p><b>Prompts:</b> In what way did they differ? What changes have you noticed?</p> <ul style="list-style-type: none"> <li>Are you familiar with the term person-centered care?</li> </ul> <p><b>Prompts:</b> If so, how would you describe PCC?</p> <ul style="list-style-type: none"> <li>During the care process, which part(s) of the care and treatment received do you perceive were person-centred?</li> <li>Which parts of PCC meant the most to your experience of involvement / partnership</li> </ul> <p><b>Prompts:</b> Could you give some examples? Procedures? Documentation? How staff looked after you? Something else?</p> <ul style="list-style-type: none"> <li>Do you think that health professionals have been interested in you as a person?</li> <li>Did you use an electronic health diary via the app or the web?</li> </ul> <p><b>Prompts:</b> How important was it for you? If not, did you use any other form of documentation tools or aids that had meaning for you?</p> <ul style="list-style-type: none"> <li>Is there anything else you would like to add?</li> </ul> |
|-----------------------------------------------------------------------------------------------------------------------------------------------------------------------------------------------------------------------------------------------------------------------------------------------------------------------------------------------------------------------------------------------------------------------------------------------------------------------------------------------------------------------------------------------------------------------------------------------------------------------------------------------------------------------------------------------------------------------------------------------------------------------------------------------------------------------------------------------------------------------------------------------------------------------------------------------------------------------------------------------------------------------------------------------------------------------------------------------------------------------------------------------------------------------------------------------------------------------------------------------------------------------------------------------------------------------------------------------------------------------------------------------------------------------------------------------------------------------------------------------------------------------------------------------------------------------------------------------------------------------------------------------------------------------------------------------------------------------------------------------------------------------------------------------------------------------------------------------------------------------------------------------------------------------------------------------------------------------------------------------------------------------------------------------------------------------------------------------------------------------------------------------------------------------------------------------------------------------------------------------------------------------------------------------------------------------------------------------------------------------------------------------------|--------------------------------------------------------------------------------------------------------------------------------------------------------------------------------------------------------------------------------------------------------------------------------------------------------------------------------------------------------------------------------------------------------------------------------------------------------------------------------------------------------------------------------------------------------------------------------------------------------------------------------------------------------------------------------------------------------------------------------------------------------------------------------------------------------------------------------------------------------------------------------------------------------------------------------------------------------------------------------------------------------------------------------------------------------------------------------------------------------------------------------------------------------------------------------------------------------------------------------------------------------------------------------------------------------------------------------------------------------------------------------------------------------------------------------------------------------------------------------------------------------------------------------------------------------------------------------------------------------------------------------------------------------------------------------------------------------------------------------------------------------------------------------------------------------------------------------------------------------------------------------------------------------------------------------------------------------------------------------------------------------------------------------------------------------------------------------------------------------------------------------------------------------------------------------------------------------------------------------------------------------------------------------------------------------------------------|



## COREQ (COnsolidated criteria for REporting Qualitative research) Checklist

A checklist of items that should be included in reports of qualitative research. You must report the page number in your manuscript where you consider each of the items listed in this checklist. If you have not included this information, either revise your manuscript accordingly before submitting or note N/A.

| Topic                                          | Item No. | Guide Questions/Description                                                                                                                              | Reported on Page No. |
|------------------------------------------------|----------|----------------------------------------------------------------------------------------------------------------------------------------------------------|----------------------|
| <b>Domain 1: Research team and reflexivity</b> |          |                                                                                                                                                          |                      |
| <i>Personal characteristics</i>                |          |                                                                                                                                                          |                      |
| Interviewer/facilitator                        | 1        | Which author/s conducted the interview or focus group?                                                                                                   | P. 6) DL, AW         |
| Credentials                                    | 2        | What were the researcher's credentials? E.g. PhD, MD                                                                                                     | N/A                  |
| Occupation                                     | 3        | What was their occupation at the time of the study?                                                                                                      | N/A                  |
| Gender                                         | 4        | Was the researcher male or female?                                                                                                                       | P. 1) 50% of th      |
| Experience and training                        | 5        | What experience or training did the researcher have?                                                                                                     | N/A                  |
| <i>Relationship with participants</i>          |          |                                                                                                                                                          |                      |
| Relationship established                       | 6        | Was a relationship established prior to study commencement?                                                                                              | P 5)                 |
| Participant knowledge of the interviewer       | 7        | What did the participants know about the researcher? e.g. personal goals, reasons for doing the research                                                 | N/A                  |
| Interviewer characteristics                    | 8        | What characteristics were reported about the inter viewer/facilitator? e.g. Bias, assumptions, reasons and interests in the research topic               | N/A                  |
| <b>Domain 2: Study design</b>                  |          |                                                                                                                                                          |                      |
| <i>Theoretical framework</i>                   |          |                                                                                                                                                          |                      |
| Methodological orientation and Theory          | 9        | What methodological orientation was stated to underpin the study? e.g. grounded theory, discourse analysis, ethnography, phenomenology, content analysis | P 7) Interviews      |
| <i>Participant selection</i>                   |          |                                                                                                                                                          |                      |
| Sampling                                       | 10       | How were participants selected? e.g. purposive, convenience, consecutive, snowball                                                                       | P. 5) a purposi      |
| Method of approach                             | 11       | How were participants approached? e.g. face-to-face, telephone, mail, email                                                                              | P 20 Table 1)        |
| Sample size                                    | 12       | How many participants were in the study?                                                                                                                 | P 6) 37 respon       |
| Non-participation                              | 13       | How many people refused to participate or dropped out? Reasons?                                                                                          | P 6) One patie       |
| <i>Setting</i>                                 |          |                                                                                                                                                          |                      |
| Setting of data collection                     | 14       | Where was the data collected? e.g. home, clinic, workplace                                                                                               | P 20, Table 1)       |
| Presence of non-participants                   | 15       | Was anyone else present besides the participants and researchers?                                                                                        | N/A                  |
| Description of sample                          | 16       | What are the important characteristics of the sample? e.g. demographic data, date                                                                        | P20, Table 1) 4      |
| <i>Data collection</i>                         |          |                                                                                                                                                          |                      |
| Interview guide                                | 17       | Were questions, prompts, guides provided by the authors? Was it pilot tested?                                                                            | P 21, Table 2)       |
| Repeat interviews                              | 18       | Were repeat inter views carried out? If yes, how many?                                                                                                   | N/A                  |
| Audio/visual recording                         | 19       | Did the research use audio or visual recording to collect the data?                                                                                      | P.6) Audio recd      |
| Field notes                                    | 20       | Were field notes made during and/or after the inter view or focus group?                                                                                 | N/A                  |
| Duration                                       | 21       | What was the duration of the inter views or focus group?                                                                                                 | P20, Table 1) E      |
| Data saturation                                | 22       | Was data saturation discussed?                                                                                                                           | N/A                  |
| Transcripts returned                           | 23       | Were transcripts returned to participants for comment and/or                                                                                             | N/A                  |

| Topic                                  | Item No. | Guide Questions/Description                                                                                                        | Reported on Page No. |
|----------------------------------------|----------|------------------------------------------------------------------------------------------------------------------------------------|----------------------|
|                                        |          | correction?                                                                                                                        |                      |
| <b>Domain 3: analysis and findings</b> |          |                                                                                                                                    |                      |
| <i>Data analysis</i>                   |          |                                                                                                                                    |                      |
| Number of data coders                  | 24       | How many data coders coded the data?                                                                                               | P 15)                |
| Description of the coding tree         | 25       | Did authors provide a description of the coding tree?                                                                              | N/A                  |
| Derivation of themes                   | 26       | Were themes identified in advance or derived from the data?                                                                        | P 7) Derived fr      |
| Software                               | 27       | What software, if applicable, was used to manage the data?                                                                         | P 7)                 |
| Participant checking                   | 28       | Did participants provide feedback on the findings?                                                                                 | N/A                  |
| <i>Reporting</i>                       |          |                                                                                                                                    |                      |
| Quotations presented                   | 29       | Were participant quotations presented to illustrate the themes/findings?<br>Was each quotation identified? e.g. participant number | P7-P13)              |
| Data and findings consistent           | 30       | Was there consistency between the data presented and the findings?                                                                 | N/A                  |
| Clarity of major themes                | 31       | Were major themes clearly presented in the findings?                                                                               | P 7)                 |
| Clarity of minor themes                | 32       | Is there a description of diverse cases or discussion of minor themes?                                                             | N/A                  |

Developed from: Tong A, Sainsbury P, Craig J. Consolidated criteria for reporting qualitative research (COREQ): a 32-item checklist for interviews and focus groups. *International Journal for Quality in Health Care*. 2007. Volume 19, Number 6: pp. 349 – 357

**Once you have completed this checklist, please save a copy and upload it as part of your submission. DO NOT include this checklist as part of the main manuscript document. It must be uploaded as a separate file.**

# BMJ Open

## The realities of partnership in person-centred care: a qualitative interview study with patients and professionals

|                                 |                                                                                                                                                                                                                                                                                                                                                                                                                                                                                                                                                                                                                            |
|---------------------------------|----------------------------------------------------------------------------------------------------------------------------------------------------------------------------------------------------------------------------------------------------------------------------------------------------------------------------------------------------------------------------------------------------------------------------------------------------------------------------------------------------------------------------------------------------------------------------------------------------------------------------|
| Journal:                        | <i>BMJ Open</i>                                                                                                                                                                                                                                                                                                                                                                                                                                                                                                                                                                                                            |
| Manuscript ID                   | bmjopen-2017-016491.R2                                                                                                                                                                                                                                                                                                                                                                                                                                                                                                                                                                                                     |
| Article Type:                   | Research                                                                                                                                                                                                                                                                                                                                                                                                                                                                                                                                                                                                                   |
| Date Submitted by the Author:   | 04-May-2017                                                                                                                                                                                                                                                                                                                                                                                                                                                                                                                                                                                                                |
| Complete List of Authors:       | <p>Wolf, Axel; Health and Care Sciences, Sahlgrenska academy, University of Gothenburg; Centre for Person-Centred Care (GPCC), University of Gothenburg</p> <p>Moore, Lucy; University of Exeter Medical School, Institute for Health Research</p> <p>Lydahl, Doris; Department of Sociology and Work Science, University of Gothenburg</p> <p>Naldemirci, Öncel; Department of Sociology and Work Sciences, University of Gothenburg</p> <p>Elam, Mark; Department of Sociology and Work Science, University of Gothenburg,</p> <p>Britten, Nicky; University of Exeter Medical School, Institute for Health Research</p> |
| <b>Primary Subject Heading</b>: | Health services research                                                                                                                                                                                                                                                                                                                                                                                                                                                                                                                                                                                                   |
| Secondary Subject Heading:      | Qualitative research, Nursing, Medical management, Evidence based practice                                                                                                                                                                                                                                                                                                                                                                                                                                                                                                                                                 |
| Keywords:                       | person-centred care, patient participation, partnership, patient-centered care                                                                                                                                                                                                                                                                                                                                                                                                                                                                                                                                             |
|                                 |                                                                                                                                                                                                                                                                                                                                                                                                                                                                                                                                                                                                                            |

SCHOLARONE™  
Manuscripts

1  
2  
3 1 The realities of partnership in person-centred care: a qualitative interview study  
4 2 with patients and professionals

5  
6 3

7  
8 4 Axel Wolf<sup>1,2\*</sup>, Lucy Moore<sup>4</sup>, Doris Lydahl<sup>3</sup>, Öncel Naldemirci<sup>3</sup>, Mark Elam<sup>3</sup>, Nicky  
9 5 Britten<sup>4</sup>,

10  
11  
12 6 1 Institute of Health Care Sciences, Sahlgrenska Academy, University of  
13 7 Gothenburg, Gothenburg, Sweden

14  
15  
16 8 2 Gothenburg Centre for Person Centred Care (GPCC), University of Gothenburg,  
17 9 Gothenburg, Sweden

18  
19  
20 10 3 Department of Sociology and Work Sciences, University of Gothenburg,  
21 11 Gothenburg, Sweden

22  
23  
24 12 4 Institute of Health Research, University of Exeter Medical School, Exeter, UK

25  
26  
27 13 Corresponding author:

28  
29  
30 14 Axel Wolf, Institute of Health Care Sciences, Sahlgrenska Academy, University of  
31 15 Gothenburg, Gothenburg, Sweden.

32  
33  
34 16 E-mail: axel.wolf@gu.se

35  
36  
37 17 Phone: +46 (0)31-7866034

38  
39  
40 18 Fax: +46 (0) 31-7866050

41  
42 19

43  
44 20

45  
46 21

47  
48  
49 22 **ABSTRACT**

50  
51  
52 23 **Objective:** Although conceptual definitions of person-centred care (PCC) vary,  
53 24 most models value the involvement of patients through patient-professional  
54 25 partnerships. While this may increase patients' sense of responsibility and  
55 26 control, research is needed to further understand how this partnership is created

1  
2  
3 27 and perceived. This study aims to explore the realities of partnership as  
4  
5 28 perceived by patients and health professionals in everyday PCC practice.  
6

7 **Design:** Qualitative study employing a thematic analysis of semi-structured  
8  
9 30 interviews with professionals and patients.  
10

11 **Setting:** Four internal medicine wards and 2 primary care centres in western  
12  
13 32 Sweden.  
14

15 **Participants:** 20 patients admitted to hospital wards delivering person-centred  
16  
17 34 care and 16 health professionals based on these wards and primary care centres.  
18

19  
20 35 **Results:** Our findings identified both informal and formal aspects of partnership.  
21  
22 36 Informal aspects, emerging during the interaction between healthcare  
23  
24 37 professionals and patients, without any prior guidelines or regulations  
25  
26 38 incorporated proximity and receptiveness of professionals, and building a close  
27  
28 39 connection and confidence. This epitomised a caring, respectful relationship  
29  
30 40 congruent across accounts. Formal aspects, including structured ways of  
31  
32 41 sustaining partnership were experienced differently. Professionals described  
33  
34 42 collaborating with patients to encourage participation, capture personal goals,  
35  
36 43 plan and document care. However, although patients felt listened to and  
37  
38 44 informed, they were content to ask questions and felt less involved in care  
39  
40 45 planning, documentation or exploring lifeworld goals. They commonly perceived  
41  
42 46 participation as informed discussion and agreement, deferring to professional  
43  
44 47 knowledge and expertise in the presence of an empathetic and trusting  
45  
46 48 relationship.  
47

48  
49 **Conclusions:**

50 In our study patients appear to value a process of human connectedness above  
51  
52 51 and beyond formalised aspects of documenting agreed goals and care planning.  
53  
54 52 PCC increases patients' confidence in professionals who are competent and able  
55  
56 53 to make them feel safe and secure. Informal elements of partnership provide the  
57  
58 54 conditions for communication and co-operation upon which formal relations  
59  
60 55 of partnership can be constructed.

61  
62  
63  
64  
65  
66  
67  
68  
69  
70  
71  
72  
73  
74  
75  
76  
77  
78  
79  
80  
81  
82  
83  
84  
85  
86  
87  
88  
89  
90  
91  
92  
93  
94  
95  
96  
97  
98  
99  
100  
101  
102  
103  
104  
105  
106  
107  
108  
109  
110  
111  
112  
113  
114  
115  
116  
117  
118  
119  
120  
121  
122  
123  
124  
125  
126  
127  
128  
129  
130  
131  
132  
133  
134  
135  
136  
137  
138  
139  
140  
141  
142  
143  
144  
145  
146  
147  
148  
149  
150  
151  
152  
153  
154  
155  
156  
157  
158  
159  
160  
161  
162  
163  
164  
165  
166  
167  
168  
169  
170  
171  
172  
173  
174  
175  
176  
177  
178  
179  
180  
181  
182  
183  
184  
185  
186  
187  
188  
189  
190  
191  
192  
193  
194  
195  
196  
197  
198  
199  
200  
201  
202  
203  
204  
205  
206  
207  
208  
209  
210  
211  
212  
213  
214  
215  
216  
217  
218  
219  
220  
221  
222  
223  
224  
225  
226  
227  
228  
229  
230  
231  
232  
233  
234  
235  
236  
237  
238  
239  
240  
241  
242  
243  
244  
245  
246  
247  
248  
249  
250  
251  
252  
253  
254  
255  
256  
257  
258  
259  
260  
261  
262  
263  
264  
265  
266  
267  
268  
269  
270  
271  
272  
273  
274  
275  
276  
277  
278  
279  
280  
281  
282  
283  
284  
285  
286  
287  
288  
289  
290  
291  
292  
293  
294  
295  
296  
297  
298  
299  
300  
301  
302  
303  
304  
305  
306  
307  
308  
309  
310  
311  
312  
313  
314  
315  
316  
317  
318  
319  
320  
321  
322  
323  
324  
325  
326  
327  
328  
329  
330  
331  
332  
333  
334  
335  
336  
337  
338  
339  
340  
341  
342  
343  
344  
345  
346  
347  
348  
349  
350  
351  
352  
353  
354  
355  
356  
357  
358  
359  
360  
361  
362  
363  
364  
365  
366  
367  
368  
369  
370  
371  
372  
373  
374  
375  
376  
377  
378  
379  
380  
381  
382  
383  
384  
385  
386  
387  
388  
389  
390  
391  
392  
393  
394  
395  
396  
397  
398  
399  
400  
401  
402  
403  
404  
405  
406  
407  
408  
409  
410  
411  
412  
413  
414  
415  
416  
417  
418  
419  
420  
421  
422  
423  
424  
425  
426  
427  
428  
429  
430  
431  
432  
433  
434  
435  
436  
437  
438  
439  
440  
441  
442  
443  
444  
445  
446  
447  
448  
449  
450  
451  
452  
453  
454  
455  
456  
457  
458  
459  
460  
461  
462  
463  
464  
465  
466  
467  
468  
469  
470  
471  
472  
473  
474  
475  
476  
477  
478  
479  
480  
481  
482  
483  
484  
485  
486  
487  
488  
489  
490  
491  
492  
493  
494  
495  
496  
497  
498  
499  
500  
501  
502  
503  
504  
505  
506  
507  
508  
509  
510  
511  
512  
513  
514  
515  
516  
517  
518  
519  
520  
521  
522  
523  
524  
525  
526  
527  
528  
529  
530  
531  
532  
533  
534  
535  
536  
537  
538  
539  
540  
541  
542  
543  
544  
545  
546  
547  
548  
549  
550  
551  
552  
553  
554  
555  
556  
557  
558  
559  
560  
561  
562  
563  
564  
565  
566  
567  
568  
569  
570  
571  
572  
573  
574  
575  
576  
577  
578  
579  
580  
581  
582  
583  
584  
585  
586  
587  
588  
589  
590  
591  
592  
593  
594  
595  
596  
597  
598  
599  
600  
601  
602  
603  
604  
605  
606  
607  
608  
609  
610  
611  
612  
613  
614  
615  
616  
617  
618  
619  
620  
621  
622  
623  
624  
625  
626  
627  
628  
629  
630  
631  
632  
633  
634  
635  
636  
637  
638  
639  
640  
641  
642  
643  
644  
645  
646  
647  
648  
649  
650  
651  
652  
653  
654  
655  
656  
657  
658  
659  
660  
661  
662  
663  
664  
665  
666  
667  
668  
669  
670  
671  
672  
673  
674  
675  
676  
677  
678  
679  
680  
681  
682  
683  
684  
685  
686  
687  
688  
689  
690  
691  
692  
693  
694  
695  
696  
697  
698  
699  
700  
701  
702  
703  
704  
705  
706  
707  
708  
709  
710  
711  
712  
713  
714  
715  
716  
717  
718  
719  
720  
721  
722  
723  
724  
725  
726  
727  
728  
729  
730  
731  
732  
733  
734  
735  
736  
737  
738  
739  
740  
741  
742  
743  
744  
745  
746  
747  
748  
749  
750  
751  
752  
753  
754  
755  
756  
757  
758  
759  
760  
761  
762  
763  
764  
765  
766  
767  
768  
769  
770  
771  
772  
773  
774  
775  
776  
777  
778  
779  
780  
781  
782  
783  
784  
785  
786  
787  
788  
789  
790  
791  
792  
793  
794  
795  
796  
797  
798  
799  
800  
801  
802  
803  
804  
805  
806  
807  
808  
809  
810  
811  
812  
813  
814  
815  
816  
817  
818  
819  
820  
821  
822  
823  
824  
825  
826  
827  
828  
829  
830  
831  
832  
833  
834  
835  
836  
837  
838  
839  
840  
841  
842  
843  
844  
845  
846  
847  
848  
849  
850  
851  
852  
853  
854  
855  
856  
857  
858  
859  
860  
861  
862  
863  
864  
865  
866  
867  
868  
869  
870  
871  
872  
873  
874  
875  
876  
877  
878  
879  
880  
881  
882  
883  
884  
885  
886  
887  
888  
889  
890  
891  
892  
893  
894  
895  
896  
897  
898  
899  
900  
901  
902  
903  
904  
905  
906  
907  
908  
909  
910  
911  
912  
913  
914  
915  
916  
917  
918  
919  
920  
921  
922  
923  
924  
925  
926  
927  
928  
929  
930  
931  
932  
933  
934  
935  
936  
937  
938  
939  
940  
941  
942  
943  
944  
945  
946  
947  
948  
949  
950  
951  
952  
953  
954  
955  
956  
957  
958  
959  
960  
961  
962  
963  
964  
965  
966  
967  
968  
969  
970  
971  
972  
973  
974  
975  
976  
977  
978  
979  
980  
981  
982  
983  
984  
985  
986  
987  
988  
989  
990  
991  
992  
993  
994  
995  
996  
997  
998  
999  
1000

56 Keywords:

1  
2  
3 57 Person-Centred Care, Patient-Centred Care, Patient Participation, Healthcare  
4 58 service, Qualitative

5  
6  
7 **Strengths and limitations of this study:**

- 8  
9  
10  
11  
12  
13  
14  
15  
16  
17  
18  
19  
20  
21  
22  
23  
24  
25  
26  
27  
28  
29  
30  
31  
32  
33  
34  
35  
36  
37  
38  
39  
40  
41  
42  
43  
44  
45  
46  
47  
48  
49  
50  
51  
52  
53  
54  
55  
56  
57  
58  
59  
60
- This study reports the experiences of both patients and professionals in hospital settings which have implemented an evidence based model of person centred care .
  - The study population consisted of professionals with a broad range of clinical experience and patients with diverse medical signs and symptoms.
  - Our sample was not designed to be statistically representative

68 **INTRODUCTION**

69 Increasingly clinicians are encouraged to engage, inform and involve patients<sup>1 2</sup>  
70 and support health policies that promote patient led care through ‘activated’  
71 patients trained in self-management skills<sup>3 4</sup>. Health professionals and policy  
72 makers aspire towards person centred care (PCC)<sup>5-7</sup> and recent models of PCC  
73 prioritise a whole systems approach that places patients at the centre<sup>8-10</sup>. It is  
74 clear that with professional support, patients can become active partners in their  
75 care<sup>11-15</sup> and can benefit from opportunities to take part<sup>16 17 18</sup>. However,  
76 despite the development of PCC and the push towards patient professional  
77 partnerships<sup>8</sup>, there is much talk and little action<sup>7 19-21</sup>. Substantial  
78 organisational and cultural barriers exist<sup>20 22 23 24</sup> and in order to overcome  
79 these barriers, both patients and professionals need to feel engaged, respected  
80 and treated as equals<sup>2 11 12 25 14 26 27</sup>. To date, there are numerous care concepts  
81 such as patient-centred care, individualized care and narrative medicine that  
82 touch upon patient involvement and partnership, all including some sort of  
83 reciprocity and shared knowledge<sup>28 29</sup>, self management<sup>30 31</sup> participation in  
84 decision making<sup>32</sup>. Different PCC frameworks lift patient involvement toward an  
85 enhanced therapeutic relationship that requires sharing power and  
86 responsibility<sup>6</sup>. Yet, as patients are increasingly offered more choice and

1  
2  
3 87 involvement, researchers also describe circumstances where patients choose to  
4 88 decline participation, defer decisions or feel unable to participate <sup>33 34</sup>. It seems  
5 89 that the notion of the patient as an active partner in care requires empirical  
6 90 understanding and clarity.  
7  
8  
9

10 91  
11 92 Cribb and Entwistle (2011) draw attention to the importance of an emotionally  
12 93 supportive patient-professional partnership to aid 'meaningful participation' and  
13 94 shared decision-making <sup>14</sup>. Relationships that are open ended and conversational  
14 95 are prioritised as well as professional virtues and patient capabilities. This  
15 96 approach takes into account the relational aspects of partnership, which pay  
16 97 attention to the mindfulness of professionals and the unique aspects of patients'  
17 98 lives <sup>5 35 36</sup>. However, although power sharing implies an egalitarian and  
18 99 meaningful patient-professional relationship <sup>29</sup>, the literature describes a  
19 100 hierarchy of relationships depicting the different levels of engagement,  
20 101 responsibility and shared goals <sup>31 37</sup>. This moves from the lowest level i.e.  
21 102 involvement towards participation and the highest level i.e. partnership <sup>32 37</sup>.  
22 103 Thoransdottir & Kristjansson (2014) elaborate on informal and formal  
23 104 relationships; the former describing the fundamental importance of human  
24 105 connectedness and the latter involving shared agreements on decisions and  
25 106 documentation <sup>31</sup>.  
26  
27  
28  
29

30 107  
31 108 In this paper we use a Swedish initiative for implementing an evidence-based  
32 109 PCC model as a case study. The University of Gothenburg Centre for PCC (GPCC)  
33 110 has introduced a new evidence based model<sup>38-41</sup>, supported by a programme of  
34 111 training and research, which has changed clinical practice.<sup>42</sup> This model consists  
35 112 of three 'routines' of PCC namely narrative, partnership and documentation <sup>39 42</sup>  
36 113 <sup>43</sup>. Partnership in the GPCC framework is the main routine that drives the PCC  
37 114 process. The patient's narrative paves the way for collaboration, and  
38 115 documentation safeguards this collaboration. The aim of this study is to explore  
39 116 the realities of partnership as perceived by patients and health professionals in  
40 117 everyday PCC practice.  
41  
42  
43  
44  
45  
46  
47  
48  
49  
50  
51

52 118  
53  
54  
55  
56

57 119 METHODS  
58  
59  
60

## 120 **Sample and design**

121 This study adopted an interpretive approach employing qualitative semi-  
122 structured interviews. We used a purposive sampling strategy to capture several  
123 professional categories and a convenience sampling approach for patients (table  
124 1). Four hospital wards at a large teaching hospital in west Sweden were chosen;  
125 these varied in size (18 to 36 hospital beds), specialization and patient group  
126 (patients with chronic and/or acute illness and from self-managing to bed-  
127 confined). Each ward took part in a 10 week PCC change management/training  
128 program, incorporating both lectures and workshops regarding the ethics of PCC,  
129 research findings from PCC studies as well as training in using different tools  
130 such as care plans and interview techniques. The ward manager chose members  
131 of staff (Registered Nurse (RN), Assistant Nurse (AN), Physicians) as designated  
132 change agents in the training program and to implement PCC to their colleagues  
133 on each ward.

### 134 *Table 1 Description of practitioners and patient demography*

135 Each ward manager was contacted with information about the study and gave  
136 their consent. They were then asked to recruit a nurse, an assistant nurse and a  
137 physician, with experience of working with PCC and from the training program,  
138 from their ward.

139 Patients were eligible for enrolment into the study if they were cognisant, able to  
140 communicate in Swedish and admitted to a reference ward where PCC was being  
141 implemented at the hospital. The patients were admitted for symptoms of  
142 chronic heart failure, chronic obstructive lung disease, infections, anaemia,  
143 colorectal diseases such as Ulcerative Colitis, Crohn's disease, colon surgery and  
144 hepatological disease.

145 This reference ward had implemented PCC systematically using a 10 week  
146 extensive training course facilitated by GPCC following the PCC routines<sup>38</sup>.

147 A nurse coordinator working on the ward provided eligible patients with the  
148 study information. Twenty-one patients volunteered to participate and gave  
149 their informed consent to be contacted by the study team after discharge and to



1  
2  
3 150 be interviewed about the care they had received. One patient was excluded when  
4 151 transferred from another ward to the reference ward, which hampered recall.

7 152 **Data collection**

8 153  
9  
10 154 The interview guide for practitioners included questions about how PCC related  
11 155 to the everyday work of healthcare practitioners and its implementation. The  
12 156 interview guide for patients was intended to elicit patients' experiences of care  
13 157 on the ward and their understanding of PCC (table 2).

18 158

20 159 *Table 2 Interview guide practitioners and patients*

22 160

23 161 DL conducted 12 interviews with professionals, AW conducted 2, and a trained  
24 162 research assistant conducted 3 interviews with practitioners and all interviews  
25 163 with patients.

26 164 All interviews were audio recorded, transcribed verbatim, anonymised and  
27 165 translated from Swedish into English. They were then read and checked by the  
28 166 team to ensure accuracy and fluency. Translation was literal, yet for specific  
29 167 idioms in Swedish which are not easy to translate, native English speakers in the  
30 168 research team suggested alternatives which would do better justice to the  
31 169 content and bilingual team members checked their accuracy. Any potential  
32 170 misinterpretations were clarified and agreed. All interviewees were given a  
33 171 numbered pseudonym to maintain confidentiality (P for Patient, N for Nurses, M  
34 172 for Manager and MD for Physician). All participants were told that they were free  
35 173 to withdraw their consent at any time during the study. Patients were  
36 174 interviewed after their hospital stay, in a place of their choosing to ensure that  
37 175 they felt comfortable talking about the care episode. A research assistant (MH)  
38 176 without a clinical background or connection to the hospital performed all patient  
39 177 interviews. However, she is trained sociology and had previous experience of  
40 178 conducting patient interviews. She received guidance from the team concerning  
41 179 the interview guide, qualitative interview techniques and the use of probing

1  
2  
3 180 questions throughout the present study. Probing questions were used to follow  
4 181 up a topic of discussion, to obtain a better illustration of the discussed topics and  
5 182 facilitate the dialogue in a way that the interviewees felt comfortable responding  
6 183 to questions. If interviewees did not want to talk more about a particular issue,  
7 184 the interviewer skipped the related probing questions and asked the following  
8 185 question in the guide.

9  
10  
11  
12  
13 186 The regional ethics committee in Gothenburg approved the study and all  
14 187 participants, prior to their interview, gave informed consent. If the patients  
15 188 wanted to talk to a healthcare professional about general or specific topics that  
16 189 came up during the interviews, they were able to talk to a nurse about their  
17 190 concern or thoughts.

## 191 **Analysis**

192 Interviews were thematically analysed, adopting some basic features of  
193 grounded theory. The interviews were analysed initially employing line-by-line  
194 coding and an inductive, intuitive reading of the transcripts. Transcripts were  
195 independently coded by LM, ON & DL, summarised and then discussed by online  
196 and face-to-face meetings. A combination of computer software (NVivo 9) and  
197 hand written methods were used and mind mapping to assist with the  
198 development of themes<sup>44</sup>. We then followed a deductive process to explore how  
199 the characteristics and components of partnership were experienced by  
200 professionals and patients. Early analysis identified categories associated with  
201 providing comfort, creating confidence and finding common ground through  
202 everyday informal interactions. In contrast, other categories revealed formalised  
203 care provided by professionals such as exchanging information, planning,  
204 evaluating and documenting care. However, when these were compared with  
205 patient transcripts patients described a simplified and practical process such as  
206 receiving some form of paperwork and knowing what was done. As analysis  
207 progressed we categorized these findings under two main themes: informal and  
208 formal aspects of partnership. These findings were discussed with the whole  
209 team in order to address differences and reach a consensus.

210

## 211 **Results**

1  
2  
3 212 Two main themes were found: firstly informal aspects of partnership comprising  
4 213 two subthemes, proximity & receptiveness and building a personal connection/  
5 214 confidence. Informal aspects of partnership were interpreted as those emerging  
6 215 during the interaction between healthcare professionals and patients. The  
7 216 second main theme was formal aspects of partnership having two subthemes,  
8 217 aspects of goal setting and care planning, and documentation. Formal  
9 218 partnership is about the structured ways of sustaining the relationship between  
10 219 the health professionals and the patients via deciding goals, care planning and  
11 220 documentation. The results are presented below to allow comparison between  
12 221 the 2 groups.

## 20 222 **Informal aspects of partnership**

### 21 223 *Proximity and receptiveness*

22 224 Professionals described engaging patients in conversation with the intention of  
23 225 respecting and listening to the patient, understanding the patient's situation,  
24 226 making a good start and building a close connection. Assistant nurses followed  
25 227 this process each morning and described feeling 'closer' to the patient, seeing  
26 228 and hearing aspects of the patient from a social, psychological and physical  
27 229 perspective and becoming their 'eyes and ears'. Professionals described using  
28 230 communication techniques such as posing open, straightforward questions,  
29 231 talking without distractions and not judging. A number of professionals felt this  
30 232 process aided partnership in subsequent meetings.

31 233 I think that I and the nurse get a great response from the patients, straight  
32 234 away, that they feel very comfortable in this. They know who to turn to.  
33 235 That they feel like they've been given a lot of time, even if it's not that long  
34 236 time, but the content of the consultation gives them that feeling. (MD1)

35 237 Many patients described positive feelings towards the receptiveness of staff and  
36 238 the atmosphere of the ward. Accounts of unhurried and immediate support with  
37 239 care provided in a caring and close manner were common.

38 240 Not everyone sits down at your bedside, just a few of them do. Mostly  
39 241 they pull out chair or something to sit on. They are not on their way to

1  
2  
3 242 another patient when they do that. It's more of a good opening; that we  
4 243 are sitting here now, talking, until we are finished doing that. (P1)

5  
6 244  
7

8  
9 245 Available and reliable professionals increased patients' comfort, with  
10 246 professionals described as thoughtful, open and warm, leading to patients feeling  
11 247 a sense of humanity, security, familiarity and trust.

12  
13  
14  
15 248 They say "Hi Paula!" and then they present themselves with their name  
16 249 and then the title comes. Already there they create an opportunity for  
17 250 dialogue. It's not "I'm nurse, good day." So at that point it feels like an  
18 251 openness and they simply and easily describe how my life will be in this  
19 252 room. (P2)

20  
21  
22  
23 253

24 254 *Building a close connection and confidence*

25  
26  
27  
28 255 Professionals described listening in a more engaged way to patients' wishes and  
29 256 needs. They emphasised the importance of knowing how patients felt, what they  
30 257 thought, aspects of their personality and personal knowledge, described by one  
31 258 professional as 'life-luggage'. Patients were prompted to discuss personal  
32 259 interests and common topics. For most professionals finding common ground  
33 260 built trust, security and a collaborative relationship on a person-to-person level.

34  
35  
36  
37  
38  
39 261 You may talk about books or music, or common interests so that you're  
40 262 not only... You establish a relationship beyond the nurse-patient, and it  
41 263 becomes more like person to person. (N1)

42  
43  
44  
45 264 In keeping with professionals' aspirations, many patients felt listened to and  
46 265 acknowledged. Several felt known personally, for who they were and their  
47 266 individual needs.

48  
49  
50 267

51  
52 268 They could ask ordinary questions about the everyday life. We could talk  
53 269 about summer houses, and pets, and kind of on that level. And that's... I  
54 270 think that's very important. I think so at least... one is feeling more as if  
55 271 you aren't just a patient among others. (P3)

1  
2  
3 272 Some patients reported that they noticed changes in professionals' receptiveness.

4  
5 273 'I was thinking that I should ask him to sit down, but you know how it is,  
6  
7 274 no. But I can think that it's a different situation. He stands there taller  
8  
9 275 than me who's sitting on the bedside. I don't like that....But what I regret  
10  
11 276 is that I wasn't able to look at my x-rays on CT-abdomen. I had asked for  
12  
13 277 that previously, but I didn't receive an answer to that. Well, I might have  
14  
15 278 said that I wanted to see my x-rays. It can be interesting to look with a  
16  
17 279 physician, because I know nothing about... I can't do it myself. So I asked  
18  
19 280 for that the last day, but she said that she was much stressed, the assistant  
20  
21 281 physician, and she had had very much to do. I would have wanted that.  
22  
23 282 I'm sure I will get them to my home. I have requested everything and my  
24  
25 283 medical records, but I can't examine things like those. It wasn't anything,  
26  
27 284 but it would have been interesting to look at it. Sit with a doctor and  
28  
29 285 review it (P4)

286

287 However other patients paid less attention to this change in professionals'  
288 receptiveness since they considered their hospitalisation as brief and requiring  
289 straightforward treatment.

290

### 291 **Formal partnership**

#### 292 *Goal setting and care planning*

293 Professionals reported working in partnership with patients in formal ways by  
294 giving and exchanging information, updating, summarizing and care planning.  
295 For example, patients are encouraged to discuss aspects of their symptoms,  
296 treatment, diagnosis and discharge plans. A number of professionals described  
297 making a 'team decision', alternatively known as a health plan, in collaboration  
298 with patients. This acknowledged a person's capabilities and personal goals that  
299 were agreed, documented and given to the patient. This is in line with the PCC  
300 routine of safeguarding the partnership through agreed goals.

301 The patient when at the hospital together with the nurse and the doctor  
302 decided what are the main issues: is it losing weight, is it anxiety, is it stop

1  
2  
3 303 smoking or getting better medication or is it more training, physical  
4 304 activities, is it fear of training? And so on. So when they left the hospital  
5  
6 305 they had this sheet where they had described their problem and it was  
7  
8 306 just, it was their problem it was not a standard formula – the formula was  
9  
10 307 standard but the questions and the wishes from the patient was personal  
11 308 (MD2)

12  
13  
14 309 Informal aspects of partnership led to an environment where it became possible  
15 310 for patients to ask questions, learn about their condition and treatment.  
16  
17 311 Professionals believed patients had the inclination to begin caring for themselves,  
18  
19 312 follow suggestions and instructions. Formal aspects such as discussing goals  
20  
21 313 facilitated self-care such as getting dressed, mobilising on the ward, preparing  
22  
23 314 for discharge and following advice post discharge.

24  
25 315 Several professionals described the need to encourage, 'push' or 'pass' on  
26  
27 316 competence to the patient, by letting the patient ask questions and take part in  
28  
29 317 the care planning, hence enabling the patient to become well informed,  
30  
31 318 knowledgeable and take responsibility.

32  
33 319 There is a more practical understanding that the patient also carries a  
34  
35 320 responsibility, and also is responsible for the process. I tend to think that  
36  
37 321 my ward is at this stage of the process – to get the patient to understand  
38  
39 322 the significance of his or her participation to activity, to rehabilitation.  
40  
41 323 (M1)

42  
43 324  
44 325 Professionals noticed a change, where patients who were well informed, knew  
45  
46 326 they had an impact, influence and could handle themselves. They seemed  
47  
48 327 satisfied and more willing to help themselves and 'buy the whole concept'.

49  
50 328 We look at what the patient usually does in their everyday life outside the  
51  
52 329 hospital, and what the patient does right now, and what we can do to  
53  
54 330 improve and to support that the patient becomes their ordinary self again.  
55  
56 331 And that you really try to understand how they can use their own  
57  
58 332 resources and train themselves. (N2)

59  
60 333

1  
2  
3 334 However from the patient perspective some remembered taking part in  
4 335 developing a health plan but few mentioned goals and when discussed, these  
5 336 were invariably described in medicalised terms or framed around home  
6 337 circumstances for discharge. Personal information was elicited and described,  
7 338 but not necessarily orientated towards 'lifeworld' goals.

11  
12 339 I don't actually know if the goal has been mentioned, but that might be the  
13 340 goal with the illness I have, that the goal is to be free from relapses.  
14 341 Because everything would then be as good as they can be. One wouldn't  
15 342 suffer from the disease then. As long as one takes medicine that doesn't  
16 343 give side-effects and isn't suffering from relapses, then everything will be  
17 344 okay. And I know that has been mentioned, that it might be the goal after  
18 345 all. But that, as I said, that has to do with the disease. (P5)

21  
22 346 Patients felt they contributed when they discussed choices with professionals,  
23 347 helped themselves, used their initiative and became knowledgeable. There were  
24 348 opportunities to question, decline treatment and contribute to discharge  
25 349 planning. For some, participation involved discussing test results, investigations  
26 350 and medication management that helped them 'feel' (our emphasis) they were  
27 351 committed to taking part in their care, for example by discussing an ultrasound  
28 352 test, a transfusion or a colonoscopy procedure. They received explanations and  
29 353 felt they knew what to do, how to deal with medication and treatments.

32  
33 354 I know much more about my illness now and why it has become the way  
34 355 it has, I think I understand that better now. And that I can see in hindsight  
35 356 that I haven't been feeling well for a very long time, which has been  
36 357 connected to this. So now I have got a much clearer picture of my  
37 358 condition. (P6)

38  
39 359  
40  
41 360 Others felt they participated by listening to professionals, agreeing and accepting  
42 361 professionals' decision-making. They felt confident, comfortable and treated as  
43 362 equals, described by one patient as 'horizontal communication'. A few patients  
44 363 described themselves as 'experienced', 'verbal' even when very ill and able to  
45 364 'demand and ask questions'. Yet for patients in this study, participating was  
46 365 described in terms of informed discussion, acceptance and agreement,

1  
2  
3 366 participating up to a point or as far as they felt able. Several felt comfortable  
4  
5 367 'submitting' and 'not being in the driving seat'.  
6

7 368 Many times one might feel like one is participating... one sometimes may  
8  
9 369 be silent, but still feel a fellowship. Do you understand what I mean? And  
10  
11 370 that's probably what I felt with the ward. That I didn't need to ask or I  
12  
13 371 didn't need to ask them, the nurses I mean, since I knew in some way that  
14  
15 372 the community still was there. (P7)  
16

17 373

18 374 When I say no to something, they listen to me. Whatever it might be; the  
19  
20 375 discharge or anything. Or some kind of examination... I said no to an  
21  
22 376 examination, and I said that: "You did that examination just six months  
23  
24 377 ago, and it's very painful. Is it really necessary to do it again?" "No, then  
25  
26 378 we won't do it." (P1)  
27

28 379

29 380 Since you are part of the treatments, and you know how they are doing  
30  
31 381 the plan for the treatment and are explaining in a good way. So even when  
32  
33 382 you return home, you know approximately about... Well, now I know how  
34  
35 383 I will deal with the medications and the treatment and everything, in a  
36  
37 384 completely different way. (P7)  
38

39 385

40 386 Documentation

41 387 Professionals described writing care plans with patients, eliciting biomedical  
42  
43 388 information and discussing social and discharge planning. Decisions and plans  
44  
45 389 were agreed and documented.

46 390 You should make a plan together with the patient and that you discuss  
47  
48 391 with the patient and so on, but the difference of having it in this way is  
49  
50 392 that you have more of a structure of it. You create a framework for what it  
51  
52 393 means to work like this, so that what you're doing becomes more  
53  
54 394 concrete. (MD3)

55 395 In some way the patient gets what we've done on paper, and we get a  
56  
57 396 proof of that we understand it in the right way, so that the patient can say  
58  
59  
60



1  
2  
3 397 “Yes, this is how it was” or “I don’t agree with this.” The important thing is  
4 398 that you agree, so that you are on the same page so to speak. (N1)

5  
6  
7 399 In this respect professionals described ‘a new practice’ where patients were  
8 encouraged to actively participate, become more involved and take part in  
9 400 decisions about their care.  
10 401

11  
12  
13 402 Documentation acted as a reminder for patients to discuss care on ‘a new  
14 403 level’. (N3)

15  
16  
17 404 You must create a care plan with the patient within 48 hours and then  
18 405 you should write why they have sought care and what we have planned  
19 406 for them and this should be addressed at the round with the patient, and  
20 407 it is written down and then it's a little investigation to see what the  
21 408 patients can do themselves. (N4)

22  
23  
24  
25  
26  
27 409 Professionals encouraged patients to use their own resources and expertise. For  
28 410 example patients were encouraged to prepare for conversations with the team  
29 411 and write down thoughts or questions.

30  
31  
32 412 Patients felt informed about their condition, discharge and future care needs, felt  
33 413 they were listened to and some felt they were participating in their care plan.

34  
35  
36  
37 414 I think, that it felt like it was a team. Decisions where I participated in, and  
38 415 the care plan and such things. How much you actually were that, I don’t  
39 416 know, but at least you had a picture of it, so. But I can’t decide how I’m  
40 417 going to be treated or taken care of, but at least you can be a part of it and  
41 418 have opinions, you were able to do that. (P8)

42  
43  
44  
45  
46 419 Although patients remembered receiving written information and some  
47 420 described opportunities to write down thoughts, questions and contribute to  
48 421 their care, they did not remember the written information in any detail.  
49 422 Nevertheless, patients saw this documentation in ‘simple’ terms whereby they  
50 423 felt taken care of and in receipt of sufficient information.

51  
52  
53  
54  
55 424 Discussion  
56  
57  
58  
59  
60

1  
2  
3 425 In our study, interviewees' accounts reflect levels of mutuality, self-expression  
4 426 and respect that lay the groundwork for PCC and indicate a move from disease  
5 427 focused models of care <sup>19</sup>. In keeping with the literature we suggest that informal  
6 428 elements of partnership provide the conditions for communication and mutual  
7 429 co-operation upon which formal relations of partnership can be constructed <sup>27 31</sup>  
8 430 <sup>36</sup>. Professional and patient perspectives highlight the importance of the informal  
9 431 elements of partnership for ultimately determining the level of shared decision  
10 432 making which is possible to aspire to and practically achieve <sup>14</sup>. Informal  
11 433 elements in our study depict emotionally supportive relationships that pave the  
12 434 way for patients to participate, once the scene is set and the circumstances feel  
13 435 right.

14 436  
15 437 However, in our findings patients were content to be able to ask questions and  
16 438 receive information. They perceived participation as informed discussion and  
17 439 agreement, deferring to professional knowledge and expertise and not  
18 440 necessarily describing opportunities for empowerment and activation. Perceived  
19 441 competence of professionals seemed enough for patients and whilst patients  
20 442 prioritised the informal processes where 'good care' may have been interpreted  
21 443 as PCC, professionals prioritised outcomes that were formal and documented.  
22 444 Patients described participating in plans for discharge but did not describe  
23 445 notions of enablement or control. As with other studies, patients were satisfied  
24 446 with a personal approach and a positive partnership with professionals who  
25 447 communicated empathetically and effectively <sup>45</sup> with professionals acting as  
26 448 educators, building mutual and collaborative partnerships <sup>46</sup>. Measurements of  
27 449 optimum patient-professional relationships and person-centredness need to  
28 450 consider patients' emotional and personal responses that highlight the process  
29 451 rather than the outcome of interactions with health professionals <sup>5 14 27 35</sup>.

30 452 Aspects of informal and formal partnership appeared to act as antecedents of  
31 453 patient participation. Yet overall, most patients portrayed a taken-for-granted  
32 454 pragmatism, trusting professionals with expertise and competence to make  
33 455 overall decisions in a caring environment. For patients in this study, PCC was not  
34 456 explicitly understood or described as an opportunity to formalize a partnership  
35 457 with professionals in order to actively participate in their care. There were more

1  
2  
3 458 informal aspects of partnership that took precedence in patients' minds, which is  
4  
5 459 in line with the description of the fundamentals of human connectedness  
6  
7 460 described by Thoransdottir & Kristjansson (2014), pointing toward the ethical  
8  
9 461 dimension of partnership and PCC. In addition, professionals may have  
10  
11 462 considered PCC as a particular professional approach rather than a systematic  
12  
13 463 endeavour to "invite" patients to participate in the PCC routines and explicate  
14  
15 464 the model.

16 465 Aspects of partnership, particularly informal aspects, led patients to leave some  
17  
18 466 decisions to the professionals since they felt cared for and well informed.  
19  
20 467 Patients were not forced to make a choice, but they were rather given guidance  
21  
22 468 and information. In this respect patients' interpretation of participation can be  
23  
24 469 viewed, not as passive submission or deferment to professional expertise and  
25  
26 470 knowledge, but a common understanding reached through a therapeutic  
27  
28 471 relationship. Our interpretation of the present study points toward the  
29  
30 472 importance of human connectedness and the feeling of being listen to and  
31  
32 473 acknowledged as a person (informal aspect) for patients, while routines and  
33  
34 474 formal aspects of care came more into the foreground for the practitioners. It  
35  
36 475 seems as if in order to integrate the patient into clinical practice, there seems to  
37  
38 476 be a balancing act that practitioners as well as patients need to reflect upon:  
39  
40 477 recognition of the patient as a person (informal aspects) needs to balance the  
41  
42 478 specific practical routines (formal aspects)<sup>42</sup>. The risk could otherwise be that  
43  
44 479 the patient as a person becomes a "checkbox" in a routine, which in many aspects  
45  
46 480 would entrench profession-centred care rather than person-centredness.

47  
48  
49  
50  
51  
52  
53  
54  
55  
56  
57  
58  
59  
60

481  
482 This study has some limitations. Patients did not necessarily perceive their care  
483  
484 in the context of a PCC model and our study depended upon patients  
485  
486 remembering events and perhaps perceiving the relevance of information and  
487  
488 care strategies. Secondly, because the study took place in a particular  
489  
490 institutional context (GPCC) in Sweden, the findings may not be transferable to  
491  
492 other settings. Formal aspects of partnership, for example, documented care  
493  
494 plans and decisions, could have provided patients with opportunities to revisit  
495  
496 decisions in written form, and maintain a sense of confidence and trust during

1  
2  
3 490 their admission that was taken for granted. Most interviewees were older  
4 491 perhaps predisposing them to comply with professional expertise or feel  
5 492 knowledgeable but not necessarily empowered<sup>47</sup>. Ekdahl et al<sup>48</sup> suggest that  
6 493 older peoples' preferences for information and decision making aren't fully  
7 494 acknowledge and/or acted upon by the healthcare professional. Patients aged 75  
8 495 years and above may want more information relating to their care, without  
9 496 having to ask. Therefore healthcare professionals need to be receptive and  
10 497 responsive to patients' preferences and tailor the information and decision  
11 498 making process accordingly.

12  
13 499 Another limitation in this study is that patients were first contacted by a nurse  
14 500 coordinator and after agreeing to be part of the study, participants were  
15 501 contacted by the researchers after their discharge within the first 7 days to  
16 502 schedule a interview. Patients who agreed to participate in the interview study  
17 503 might have been more attentive to the particular aspects of PCC and eager to talk  
18 504 about their experience. This might have led to the tendency for positive accounts  
19 505 about the informal parts of partnership. However, it is equally important for the  
20 506 objective of the study to capture positive comments about partnership.

### 21 507 Conclusion

22 508 In our study patients appear to value a process of human connectedness above  
23 509 and beyond formal aspects of taking part and feeling activated and capable.  
24 510 These findings may point to the need for professionals to acknowledge the  
25 511 importance of the human connectedness that is as crucial as formal aspects for  
26 512 PCC to be fully realised in practice.

### 27 513 28 514 Author contributions

29 515 LM and AW contributed equally to the study as first authors. All authors  
30 516 contributed to the study design, conception and development. DL and AW  
31 517 conducted the interviews together with research assistant Marie Hammer. LM,  
32 518 DL and ÖN initially analysed the data, and all authors met face to face and over  
33 519 skype as a group to discuss, revise and confirm the findings. All authors were  
34 520 responsible for critical revision and finalising the manuscript.

1  
2  
3 521 **Competing interest**  
4 522 Nicky Britten is a member of the Scientific Advisory Board of GPCC. The  
5  
6 523 author(s) declared no potential conflicts of interest with respect to the research,  
7  
8 524 authorship, and/or publication of this article.  
9

10 525 **Funding**

11 526 The study was funded by the Centre for Person-Centred Care (GPCC) and  
12  
13 527 LETStudio at the University of Gothenburg, Sweden. GPCC is funded by the  
14  
15 528 Swedish Government's grant for Strategic Research Areas, Care Sciences  
16  
17 529 (Application to Swedish Research Council No. 2009-1088) and cofunded by the  
18  
19 530 University of Gothenburg, Sweden. Nicky Britten was partially supported by the  
20  
21 531 National Institute for Health Research (NIHR) Collaboration for Leadership in  
22  
23 532 Applied Health Research and Care South West Peninsula. The views expressed  
24  
25 533 are those of the authors and not necessarily those of the NHS, the NIHR or the  
26  
27 534 Department of Health. The authors are grateful to the interviewees for their  
28  
29 535 willingness to participate in the study.

30 536 **Data sharing statement**

31  
32 537 No additional unpublished data is available  
33

34 538

35  
36 539 **Wordcount 4913**  
37

38 540

39 541 **References**

- 40  
41 542 1. Elwyn G, Frosch D, Thomson R, et al. Shared decision making: a model for  
42 543 clinical practice. *J Gen Intern Med* 2012;27(10):1361-7. doi:  
43 544 10.1007/s11606-012-2077-6 [published Online First: 2012/05/24]  
44 545 2. Elwyn G, Lloyd A, May C, et al. Collaborative deliberation: a model for patient  
45 546 care. *Patient Educ Couns* 2014;97(2):158-64. doi:  
46 547 10.1016/j.pec.2014.07.027 [published Online First: 2014/09/02]  
47 548 3. Department of Health. Long term conditions compendium of information,  
48 549 2012.  
49 550 4. Eaton S, Roberts S, Turner B. Delivering person centred care in long term  
50 551 conditions. *Bmj* 2015;350:h181. doi: 10.1136/bmj.h181 [published  
51 552 Online First: 2015/02/12]  
52 553 5. Epstein RM, Street RL, Jr. The values and value of patient-centered care. *Ann*  
53 554 *Fam Med* 2011;9(2):100-3. doi: 10.1370/afm.1239 [published Online  
54 555 First: 2011/03/16]

- 1  
2  
3 556 6. Harding E, Wait S, Scrutton J. The state of play in person-centred care:  
4 557 pragmatic review of how person-centred care is defined, applied and  
5 558 measured, featuring selected key contributors and case studies across the  
6 559 field.: The Health Foundation, 2015:1-140.
- 7 560 7. Hawkes N. Seeing things from the patients' view: what will it take? *Bmj*  
8 561 2015;350:g7757. doi: 10.1136/bmj.g7757 [published Online First:  
9 562 2015/02/12]
- 10 563 8. Health Foundation. Helping people help themselves, 2011.
- 11 564 9. King's Fund. People in control of their own health and care, 2014.
- 12 565 10. NHS England. Enhancing the quality of life for people living with long term  
13 566 conditions-the house of care, 2014.
- 14 567 11. Coulter A. Patient engagement--what works? *J Ambul Care Manage*  
15 568 2012;35(2):80-9. doi: 10.1097/JAC.0b013e318249e0fd [published Online  
16 569 First: 2012/03/15]
- 17 570 12. Coulter A, Collins A. Making shared decision-making a reality; no decision  
18 571 about me, without me. London: The King's Fund, 2011:1-40.
- 19 572 13. Coulter A, Safran D, Wasson JH. On the language and content of patient  
20 573 engagement. *J Ambul Care Manage* 2012;35(2):78-9. doi:  
21 574 10.1097/JAC.0b013e31824a5676 [published Online First: 2012/03/15]
- 22 575 14. Cribb A, Entwistle VA. Shared decision making: trade-offs between narrower  
23 576 and broader conceptions. *Health Expect* 2011;14(2):210-9. doi:  
24 577 10.1111/j.1369-7625.2011.00694.x
- 25 578 15. Makoul G, Clayman ML. An integrative model of shared decision making in  
26 579 medical encounters. *Patient Educ Couns* 2006;60(3):301-12. doi:  
27 580 10.1016/j.pec.2005.06.010
- 28 581 16. Amin F. Commentary: Becoming a person centred practice. *Bmj*  
29 582 2015;350:h269. doi: 10.1136/bmj.h269 [published Online First:  
30 583 2015/02/12]
- 31 584 17. National Voices. Principles of care and support planning, 2013.
- 32 585 18. Coulter A, Entwistle VA, Eccles A, et al. Personalised care planning for adults  
33 586 with chronic or long-term health conditions. *Cochrane Database Syst Rev*  
34 587 2015;3:CD010523. doi: 10.1002/14651858.CD010523.pub2 [published  
35 588 Online First: 2015/03/04]
- 36 589 19. Ekman I, Swedberg K, Taft C, et al. Person-centered care--ready for prime  
37 590 time. *Eur J Cardiovasc Nurs* 2011;10(4):248-51. doi:  
38 591 10.1016/j.ejcnurse.2011.06.008 [published Online First: 2011/07/19]
- 39 592 20. Frosch DL. The patient is the most important member of the team. *Bmj*  
40 593 2015;350:g7767. doi: 10.1136/bmj.g7767 [published Online First:  
41 594 2015/02/12]
- 42 595 21. Frosch DL, May SG, Rendle KA, et al. Authoritarian physicians and patients'  
43 596 fear of being labeled 'difficult' among key obstacles to shared decision  
44 597 making. *Health Aff (Millwood)* 2012;31(5):1030-8. doi:  
45 598 10.1377/hlthaff.2011.0576 [published Online First: 2012/05/09]
- 46 599 22. Moore L, Britten N, Lydahl D, et al. Barriers and facilitators to the  
47 600 implementation of person-centred care in different healthcare contexts.  
48 601 *Scand J Caring Sci* 2016 doi: 10.1111/scs.12376
- 49 602 23. Naldemirci O, Lydahl D, Britten N, et al. Tenacious assumptions of person-  
50 603 centred care? Exploring tensions and variations in practice. *Health*  
51 604 (*London*) 2016 doi: 10.1177/1363459316677627

- 1  
2  
3 605 24. Alharbi TS, Ekman I, Olsson LE, et al. Organizational culture and the  
4 606 implementation of person centered care: results from a change process in  
5 607 Swedish hospital care. *Health Policy* 2012;108(2-3):294-301. doi:  
6 608 10.1016/j.healthpol.2012.09.003  
7  
8 609 25. Gravel K, Legare F, Graham ID. Barriers and facilitators to implementing  
9 610 shared decision-making in clinical practice: a systematic review of health  
10 611 professionals' perceptions. *Implement Sci* 2006;1:16. doi: 10.1186/1748-  
11 612 5908-1-16 [published Online First: 2006/08/11]  
12 613 26. Entwistle VA. Considerations of 'fit' and patient involvement in decision  
13 614 making. *Health Expect* 2006;9(2):95-7. doi: 10.1111/j.1369-  
14 615 7625.2006.00397.x  
15 616 27. Entwistle VA, Watt IS. Patient involvement in treatment decision-making: the  
16 617 case for a broader conceptual framework. *Patient Educ Couns*  
17 618 2006;63(3):268-78. doi: 10.1016/j.pec.2006.05.002  
18 619 28. Hudon C, Fortin M, Haggerty J, et al. Patient-centered care in chronic disease  
19 620 management: a thematic analysis of the literature in family medicine.  
20 621 *Patient Educ Couns* 2012;88(2):170-6. doi: 10.1016/j.pec.2012.01.009  
21 622 29. Mead N, Bower P. Patient-centredness: a conceptual framework and review  
22 623 of the empirical literature. *Soc Sci Med* 2000;51(7):1087-110.  
23 624 30. Sahlsten MJ, Larsson IE, Sjostrom B, et al. An analysis of the concept of patient  
24 625 participation. *Nurs Forum* 2008;43(1):2-11. doi: 10.1111/j.1744-  
25 626 6198.2008.00090.x  
26 627 31. Thorarinsdottir K, Kristjansson K. Patients' perspectives on person-centred  
27 628 participation in health care: A framework analysis. *Nursing ethics* 2013  
28 629 doi: 10.1177/0969733013490593  
29 630 32. Frank C, Asp M, Dahlberg K. Patient participation in emergency care - a  
30 631 phenomenographic analysis of caregivers' conceptions. *J Clin Nurs*  
31 632 2009;18(18):2555-62. doi: 10.1111/j.1365-2702.2008.02477.x  
32 633 33. Eldh AC, Ehnfors M, Ekman I. The phenomena of participation and non-  
33 634 participation in health care--experiences of patients attending a nurse-led  
34 635 clinic for chronic heart failure. *Eur J Cardiovasc Nurs* 2004;3(3):239-46.  
35 636 doi: 10.1016/j.ejcnurse.2004.05.001  
36 637 34. Eldh AC, Ekman I, Ehnfors M. Conditions for patient participation and non-  
37 638 participation in health care. *Nursing ethics* 2006;13(5):503-14.  
38 639 35. Epstein RM. Making communication research matter: what do patients  
39 640 notice, what do patients want, and what do patients need? *Patient Educ*  
40 641 *Couns* 2006;60(3):272-8. doi: 10.1016/j.pec.2005.11.003  
41 642 36. Epstein RM, Franks P, Fiscella K, et al. Measuring patient-centered  
42 643 communication in patient-physician consultations: theoretical and  
43 644 practical issues. *Soc Sci Med* 2005;61(7):1516-28. doi:  
44 645 10.1016/j.socscimed.2005.02.001  
45 646 37. Cahill J. Patient participation: a concept analysis. *J Adv Nurs* 1996;24(3):561-  
46 647 71.  
47 648 38. Ekman I, Wolf A, Olsson LE, et al. Effects of person-centred care in patients  
48 649 with chronic heart failure: the PCC-HF study. *Eur Heart J*  
49 650 2012;33(9):1112-9. doi: 10.1093/eurheartj/ehr306 [published Online  
50 651 First: 2011/09/20]  
51 652 39. Fors A, Ekman I, Taft C, et al. Person-centred care after acute coronary  
52 653 syndrome, from hospital to primary care - A randomised controlled trial.

- 1  
2  
3 654 *Int J Cardiol* 2015;187:693-9. doi: 10.1016/j.ijcard.2015.03.336  
4 655 [published Online First: 2015/04/29]  
5 656 40. Feldthusen C, Dean E, Forsblad-d'Elia H, et al. Effects of person-centered  
6 657 physical therapy on fatigue-related variables in persons with rheumatoid  
7 658 arthritis: a randomized controlled trial. *Arch Phys Med Rehabil*  
8 659 2016;97(1):26-36.  
9 660 41. Olsson LE, Hansson E, Ekman I. Evaluation of person-centred care after hip  
10 661 replacement-a controlled before and after study on the effects of fear of  
11 662 movement and self-efficacy compared to standard care. *BMC nursing*  
12 663 2016;15(1):53. doi: 10.1186/s12912-016-0173-3  
13 664 42. Britten N, Moore L, Lydahl D, et al. Elaboration of the Gothenburg model of  
14 665 person-centred care. *Health Expect* 2016 doi: 10.1111/hex.12468  
15 666 [published Online First: 2016/05/20]  
16 667 43. Ekman I, Hedman H, Swedberg K, et al. Commentary: Swedish initiative on  
17 668 person centred care. *Bmj* 2015;350:h160. doi: 10.1136/bmj.h160  
18 669 [published Online First: 2015/02/12]  
19 670 44. Miles MB, Huberman AM, Saldana J. Qualitative data analysis: A methods  
20 671 sourcebook. Third ed. London: Sage Publications 2014.  
21 672 45. Little P, Everitt H, Williamson I, et al. Observational study of effect of patient  
22 673 centredness and positive approach on outcomes of general practice  
23 674 consultations. *BMJ* 2001;323(7318):908-11. [published Online First:  
24 675 2001/10/23]  
25 676 46. Roter D. The enduring and evolving nature of the patient-physician  
26 677 relationship. *Patient Educ Couns* 2000;39(1):5-15.  
27 678 47. Joseph-Williams N, Elwyn G, Edwards A. Knowledge is not power for  
28 679 patients: a systematic review and thematic synthesis of patient-reported  
29 680 barriers and facilitators to shared decision making. *Patient Educ Couns*  
30 681 2014;94(3):291-309. doi: 10.1016/j.pec.2013.10.031 [published Online  
31 682 First: 2013/12/07]  
32 683 48. Ekdahl AW, Andersson L, Wiréhn A-B, et al. Are elderly people with co-  
33 684 morbidities involved adequately in medical decision making when  
34 685 hospitalised? A cross-sectional survey. *BMC geriatrics* 2011;11(1):46.  
35  
36  
37  
38  
39  
40 686  
41 687  
42  
43 688  
44  
45  
46  
47  
48  
49  
50  
51  
52  
53  
54  
55  
56  
57  
58  
59  
60



689 **Table 1**

| Health professionals (n=17) |                 |
|-----------------------------|-----------------|
| Women (n)                   | 14              |
| Profession                  |                 |
| Registered nurse            | 5               |
| Assistant nurse             | 4               |
| Manager                     | 4               |
| Physician                   | 4               |
| Interview range             | 29-60 minutes   |
| Place for interview         |                 |
| Hospital                    | 13              |
| Primary care center         | 2               |
| University                  | 2               |
| Patient (n=20)              |                 |
| Women (n)                   | 11              |
| Age median (range)          | 69, 35-88 years |
| Interview range             | 19-83 minutes   |
| Place for interview         |                 |
| Home                        | 13              |
| Hospital                    | 2               |
| University                  | 1               |
| Telephone                   | 4               |

690

691 **Table 2**

692

| Interview guide: Health professionals | Interview guide: Patients |
|---------------------------------------|---------------------------|
|                                       |                           |

|                                                                                                                                                                                                                                                                                                                                                                                                                                                                                                                                                                                                                                                                                                                                                                                                                                                                                                                                                                                                                                                                                                                                                                                                                                                                                                                                                                                                                                                                                                                                                                                                                                                                                                                                                                                                                                                                                                                                                                                                                                                                                                                                                                                                                                                                                                                                                                                                     |                                                                                                                                                                                                                                                                                                                                                                                                                                                                                                                                                                                                                                                                                                                                                                                                                                                                                                                                                                                                                                                                                                                                                                                                                                                                                                                                                                                                                                                                                                                                                                                                                                                                                                         |
|-----------------------------------------------------------------------------------------------------------------------------------------------------------------------------------------------------------------------------------------------------------------------------------------------------------------------------------------------------------------------------------------------------------------------------------------------------------------------------------------------------------------------------------------------------------------------------------------------------------------------------------------------------------------------------------------------------------------------------------------------------------------------------------------------------------------------------------------------------------------------------------------------------------------------------------------------------------------------------------------------------------------------------------------------------------------------------------------------------------------------------------------------------------------------------------------------------------------------------------------------------------------------------------------------------------------------------------------------------------------------------------------------------------------------------------------------------------------------------------------------------------------------------------------------------------------------------------------------------------------------------------------------------------------------------------------------------------------------------------------------------------------------------------------------------------------------------------------------------------------------------------------------------------------------------------------------------------------------------------------------------------------------------------------------------------------------------------------------------------------------------------------------------------------------------------------------------------------------------------------------------------------------------------------------------------------------------------------------------------------------------------------------------|---------------------------------------------------------------------------------------------------------------------------------------------------------------------------------------------------------------------------------------------------------------------------------------------------------------------------------------------------------------------------------------------------------------------------------------------------------------------------------------------------------------------------------------------------------------------------------------------------------------------------------------------------------------------------------------------------------------------------------------------------------------------------------------------------------------------------------------------------------------------------------------------------------------------------------------------------------------------------------------------------------------------------------------------------------------------------------------------------------------------------------------------------------------------------------------------------------------------------------------------------------------------------------------------------------------------------------------------------------------------------------------------------------------------------------------------------------------------------------------------------------------------------------------------------------------------------------------------------------------------------------------------------------------------------------------------------------|
| <p>1</p> <p>2</p> <p>3</p> <p>4</p> <p>5</p> <p>6</p> <p>7</p> <p>8</p> <p>9</p> <p>10</p> <p>11</p> <p>12</p> <p>13</p> <p>14</p> <p>15</p> <p>16</p> <p>17</p> <p>18</p> <p>19</p> <p>20</p> <p>21</p> <p>22</p> <p>23</p> <p>24</p> <p>25</p> <p>26</p> <p>27</p> <p>28</p> <p>29</p> <p>30</p> <p>31</p> <p>32</p> <p>33</p> <p>34</p> <p>35</p> <p>36</p> <p>37</p> <p>38</p> <p>39</p> <p>40</p> <p>41</p> <p>42</p> <p>43</p> <p>44</p> <p>45</p> <p>46</p> <p>47</p> <p>48</p> <p>49</p> <p>50</p> <p>51</p> <p>52</p> <p>53</p> <p>54</p> <p>55</p> <p>56</p> <p>57</p> <p>58</p> <p>59</p> <p>60</p> <ul style="list-style-type: none"> <li>To start with, could you tell me a bit about this ward/clinic/centre?</li> </ul> <p><b>Prompts:</b> Size? Practical work? Team?</p> <ul style="list-style-type: none"> <li>How did you start working with PCC?</li> </ul> <p><b>Prompts:</b> First contact with PCC? When did you first hear about it? Where did the idea come from? Did you have a special training?</p> <ul style="list-style-type: none"> <li>How did you implement PCC in the ward/clinic/centre? What did the implementation look like?</li> <li>Could you tell me about a regular day at work with PCC?</li> <li>Tell me about your practice and experiences with PCC on this ward/clinic/centre?</li> <li>How would you describe PCC to someone who is coming to work with you on your ward/center?</li> </ul> <p><b>Prompts:</b> How would you describe or define PCC?</p> <ul style="list-style-type: none"> <li>How did patients react to PCC?</li> <li>Would you tell me about any changes to your practice since you started working with PCC?</li> </ul> <p><b>Prompts:</b> Were there any changes in your ways of working? Relations with patients? Routines? Division of labour? Any changes-adaptions?</p> <ul style="list-style-type: none"> <li>What kind of documentation do you use when you work with PCC? Do you use any tools, diaries, notebooks, written material as part of PCC during your day? Can you describe this for me? How do you use this documentation for PCC in your work?</li> <li>What kinds of conditions do you think are required for PCC?</li> <li>What kinds of things do you think helped PCC and what kinds of things made PCC difficult in your experience?</li> <li>Is there anything else you would like to add?</li> </ul> | <ul style="list-style-type: none"> <li>Could you tell me about your experience of the care you received? How would you describe the care and treatment?</li> </ul> <p><b>Prompts:</b> Can you give examples of the kind of care you received? What did the routines look like?</p> <ul style="list-style-type: none"> <li>How have you experienced the relationship between you and the staff? How did you experience the communication between you and the staff?</li> </ul> <p><b>Prompts:</b> In which ways, did you receive information? Did you discuss your care and treatment with the staff? Did the staff listen to your concerns and questions?</p> <ul style="list-style-type: none"> <li>What has been important to you in the care that you got?</li> </ul> <p><b>Prompts:</b> How did you participate in decisions, have you been seen and listened to, information and communication about your care and treatment? Do you think that your resources/knowledge have been utilized?</p> <ul style="list-style-type: none"> <li>Do you think that the care you received was different from the care you have experience in the past and (if applicable) the care that you received later?</li> </ul> <p><b>Prompts:</b> In what way did they differ? What changes have you noticed?</p> <ul style="list-style-type: none"> <li>Are you familiar with the term person-centered care?</li> </ul> <p><b>Prompts:</b> If so, how would you describe PCC?</p> <ul style="list-style-type: none"> <li>During the care process, which part(s) of the care and treatment received do you perceive were person-centred?</li> <li>Which parts of PCC meant the most to your experience of</li> </ul> |
|-----------------------------------------------------------------------------------------------------------------------------------------------------------------------------------------------------------------------------------------------------------------------------------------------------------------------------------------------------------------------------------------------------------------------------------------------------------------------------------------------------------------------------------------------------------------------------------------------------------------------------------------------------------------------------------------------------------------------------------------------------------------------------------------------------------------------------------------------------------------------------------------------------------------------------------------------------------------------------------------------------------------------------------------------------------------------------------------------------------------------------------------------------------------------------------------------------------------------------------------------------------------------------------------------------------------------------------------------------------------------------------------------------------------------------------------------------------------------------------------------------------------------------------------------------------------------------------------------------------------------------------------------------------------------------------------------------------------------------------------------------------------------------------------------------------------------------------------------------------------------------------------------------------------------------------------------------------------------------------------------------------------------------------------------------------------------------------------------------------------------------------------------------------------------------------------------------------------------------------------------------------------------------------------------------------------------------------------------------------------------------------------------------|---------------------------------------------------------------------------------------------------------------------------------------------------------------------------------------------------------------------------------------------------------------------------------------------------------------------------------------------------------------------------------------------------------------------------------------------------------------------------------------------------------------------------------------------------------------------------------------------------------------------------------------------------------------------------------------------------------------------------------------------------------------------------------------------------------------------------------------------------------------------------------------------------------------------------------------------------------------------------------------------------------------------------------------------------------------------------------------------------------------------------------------------------------------------------------------------------------------------------------------------------------------------------------------------------------------------------------------------------------------------------------------------------------------------------------------------------------------------------------------------------------------------------------------------------------------------------------------------------------------------------------------------------------------------------------------------------------|

1  
2  
3  
4  
5  
6  
7  
8  
9  
10  
11  
12  
13  
14  
15  
16  
17  
18  
19  
20  
21  
22  
23  
24  
25  
26  
27  
28  
29  
30  
31  
32  
33  
34  
35  
36  
37  
38  
39  
40  
41  
42  
43  
44  
45  
46  
47  
48  
49  
50  
51  
52  
53  
54  
55  
56  
57  
58  
59  
60

|  |                                                                                                                                                                                                                                                                                                                                                                                                                                                                                                                                                                                                                                                          |
|--|----------------------------------------------------------------------------------------------------------------------------------------------------------------------------------------------------------------------------------------------------------------------------------------------------------------------------------------------------------------------------------------------------------------------------------------------------------------------------------------------------------------------------------------------------------------------------------------------------------------------------------------------------------|
|  | <p style="text-align: right;">involvement / partnership</p> <p><b>Prompts:</b> Could you give some examples? Procedures? Documentation? How staff looked after you? Something else?</p> <ul style="list-style-type: none"> <li>• Do you think that health professionals have been interested in you as a person?</li> <li>• Did you use an electronic health diary via the app or the web?</li> </ul> <p><b>Prompts:</b> How important was it for you? If not, did you use any other form of documentation tools or aids that had meaning for you?</p> <ul style="list-style-type: none"> <li>• Is there anything else you would like to add?</li> </ul> |
|--|----------------------------------------------------------------------------------------------------------------------------------------------------------------------------------------------------------------------------------------------------------------------------------------------------------------------------------------------------------------------------------------------------------------------------------------------------------------------------------------------------------------------------------------------------------------------------------------------------------------------------------------------------------|

For peer review only

693
